# Supplementary material for: A new [4 + 1]/[4 + 2]bicycliaztion strategy for accessing functionalized indeno[1,2-b]pyran-2-ones
Source: Royal Society of Chemistry journal article supplement (doi:10.1039/c6ra16462e), 2016-01-01

## Supporting Information

### A new [4+1]/[4+2]bicycliaztion strategy for accessing functionalized indeno[1,2-*b*]pyran-2-ones

Bo Jiang,<sup>\*,a</sup> Rong Fu,<sup>a</sup> Jiang-Kai Qiu,<sup>a</sup> Yan Yu, Shu-Liang Wang,<sup>\*,a</sup> and Shu-Jiang Tu<sup>a</sup>

<sup>a</sup>School of Chemistry and Chemical Engineering, Jiangsu Key Laboratory of Green Synthetic Chemistry for Functional Materials, Jiangsu Normal University, Xuzhou 221116, P. R. China. Email: wangsl@jsnu.edu.cn (WSL); jiangchem@jsnu.edu.cn (BJ) Fax: +8651683500065; Tel: +8651683500065

#### Table of Contents

|                                                                                           |         |
|-------------------------------------------------------------------------------------------|---------|
| General information-----                                                                  | S1      |
| X-Ray Crystallography Structure of Compounds <b>3g</b> -----                              | S2      |
| General Procedure for the Synthesis of Compounds <b>3a</b> -----                          | S3      |
| Characterization Data of Compounds <b>3a-3k</b> -----                                     | S3-S7   |
| General Procedure for the Synthesis of Compounds <b>3l</b> -----                          | S7      |
| Characterization Data of Compounds <b>3l-3s</b> -----                                     | S7-S10  |
| Copies of <sup>1</sup> H and <sup>13</sup> C NMR Spectra for Compounds <b>3a-3s</b> ----- | S11-S29 |

## Experimental

### General Information

$^1\text{H}$  NMR ( $^{13}\text{C}$  NMR) spectra were measured on a Bruker DPX 400 MHz spectrometer in  $\text{DMSO-}d_6$  with chemical shift ( $\delta$ ) given in ppm relative to TMS as internal standard [(s = singlet, d = doublet, t = triplet, brs = broad singlet, m = multiplet), coupling constant (Hz)]. HRMS (APCI-TOF or ESI-TOF) was determined by using microTOF-Q II HRMS/MS instrument (BRUKER). X-Ray crystallographic analysis was performed with a Siemens SMART CCD and a Siemens P4 diffractometer.

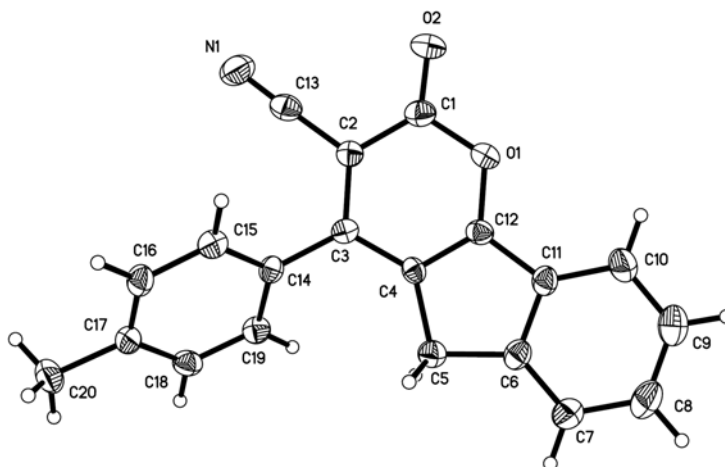

Fig 1, X-Ray Structure of **3g**

## Experimental Section

Example for the synthesis of **3a**: 2-Oxo-4-phenyl-2,5-dihydroindeno[1,2-*b*]pyran-3-carbonitrile

Phthalaldehyde **1a** (1.0 mmol) was introduced in a 50-mL round flask, 2-(1-phenylethylidene) malononitrile (**2a**, 1.0 mmol), Et<sub>3</sub>N (1.0 mmol), and DMF (8.0 mL) were then successively added and stirred at room temperature for 12 hours. After the completion of the reaction (monitored by TLC), the reaction mixture was diluted with cold water (20 mL). The solid product was collected by Büchner filtration and was purified by recrystallization from 95% EtOH to afford the desired pure indeno[1,2-*b*]pyrans **3a** as a yellow solid

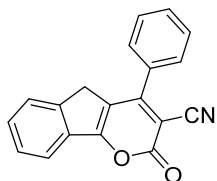

Yellow solid; mp 231- 232 °C; IR (KBr,  $\nu$ ,  $\text{cm}^{-1}$ ) 3079, 2214, 1627, 1608, 1560, 1493, 1398, 1223, 1093, 827; <sup>1</sup>H NMR (400 MHz, DMSO-*d*<sub>6</sub>;  $\delta$ , ppm) 7.86 (d,  $J$  = 7.6 Hz, 1H, ArH), 7.80-7.76 (m, 2H, ArH), 7.70 (d,  $J$  = 7.2 Hz, 1H, ArH), 7.65 (dd,  $J_1$  = 7.6,  $J_2$  = 3.6 Hz, 3H, ArH), 7.58 (q,  $J$  = 8.0 Hz, 2H, ArH), 3.80 (s, 2H, CH<sub>2</sub>); <sup>13</sup>C NMR (100 MHz, DMSO-*d*<sub>6</sub>;  $\delta$ , ppm) 163.6, 162.0, 159.7, 145.5, 133.2, 133.0, 131.2, 131.0, 128.9, 128.3, 128.0, 125.7, 120.8, 118.2, 115.6, 93.3, 33.0; HRMS (ESI)  $m/z$  calc. for C<sub>19</sub>H<sub>12</sub>NO<sub>2</sub>, 286.0868 [M+H]<sup>+</sup>; found 286.0875.

4-(4-Fluorophenyl)-2-oxo-2,5-dihydroindeno[1,2-*b*]pyran-3-carbonitrile (**3b**)

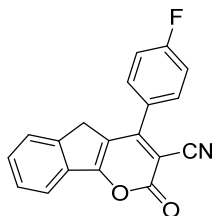

Yellow solid; mp 237-239 °C; IR (KBr,  $\nu$ ,  $\text{cm}^{-1}$ ) 3070, 2215, 1718, 1655, 1598, 1561, 1492, 1384, 1234, 1154, 847; <sup>1</sup>H NMR (400 MHz, DMSO-*d*<sub>6</sub>;  $\delta$ , ppm) 7.91-7.84 (m, 3H, ArH), 7.71 (d,  $J$  = 7.2 Hz, 1H, ArH), 7.65-7.54 (m, 2H, ArH), 7.50 (t,  $J$  = 8.8 Hz, 2H, ArH), 3.80 (s, 2H, CH<sub>2</sub>); <sup>13</sup>C NMR (100 MHz, DMSO-*d*<sub>6</sub>;  $\delta$ , ppm) 163.6 ( $J_{\text{CF}}$  = 248.4 Hz), 163.6, 161.0, 159.6, 145.5, 133.2, 131.1 ( $J_{\text{CF}}$  = 8.9 Hz), 131.1, 129.4 ( $J_{\text{CF}}$  = 3.2 Hz), 128.0, 125.7, 120.9, 118.2, 116.1 ( $J_{\text{CF}}$  = 21.9 Hz), 115.6, 93.4, 32.9; HRMS (ESI)  $m/z$  calc. for C<sub>19</sub>H<sub>11</sub>FNO<sub>2</sub>, 304.0774 [M+H]<sup>+</sup>; found 304.0787.

4-(4-Chlorophenyl)-2-oxo-2,5-dihydroindeno[1,2-*b*]pyran-3-carbonitrile (**3c**)

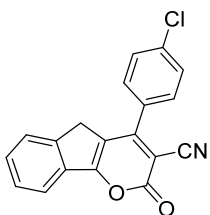

Yellow solid; mp 254-255 °C; IR (KBr,  $\nu$ ,  $\text{cm}^{-1}$ ) 3090, 2215, 1717, 1615, 1590, 1561, 1497, 1460, 1385, 1203, 1155, 839;  $^1\text{H}$  NMR (400 MHz,  $\text{DMSO-}d_6$ ;  $\delta$ , ppm) 7.87 (d,  $J = 7.2$  Hz, 1H, ArH), 7.81 (d,  $J = 8.4$ , 2H, ArH), 7.76-7.68 (m, 3H, ArH), 7.65-7.53 (m, 2H, ArH), 3.78 (s, 2H,  $\text{CH}_2$ );  $^{13}\text{C}$  NMR (100 MHz,  $\text{DMSO-}d_6$ );  $\delta$ , ppm) 163.7, 160.8, 159.6, 145.5, 136.1, 133.2, 131.8, 131.1, 130.2, 129.1, 128.1, 125.7, 120.9, 118.1, 115.5, 93.4, 32.8; HRMS (ESI)  $m/z$  calc. for  $\text{C}_{19}\text{H}_{10}\text{ClNNO}_2$ , 342.0298  $[\text{M} + \text{Na}]^+$ ; found 342.0296.

4-(2,4-Dichlorophenyl)-2-oxo-2,5-dihydroindeno[1,2-b]pyran-3-carbonitrile (**3d**)

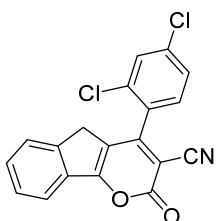

Yellow solid; mp 287-289 °C; IR (KBr,  $\nu$ ,  $\text{cm}^{-1}$ ) 3049, 2224, 1717, 1621, 1569, 1543, 1477, 1377, 1282, 1104, 828;  $^1\text{H}$  NMR (400 MHz,  $\text{DMSO-}d_6$ ;  $\delta$ , ppm) 8.01 (s, 1H, ArH), 7.89 (d,  $J = 7.2$  Hz, 1H, ArH), 7.75 (d,  $J = 8.8$  Hz, 1H, ArH), 7.69 (d,  $J = 8.8$  Hz, 2H, ArH), 7.65-7.56 (m, 2H, ArH), 3.63 (d,  $J = 8.4$  Hz, 2H,  $\text{CH}_2$ );  $^{13}\text{C}$  NMR (100 MHz,  $\text{DMSO-}d_6$ );  $\delta$ , ppm) 164.4, 159.0, 159.0, 145.4, 136.2, 133.1, 131.6, 131.5, 131.0, 129.8, 128.3, 128.2, 125.9, 121.1, 118.5, 114.6, 112.7, 95.2, 32.3; HRMS (ESI)  $m/z$  calc. for  $\text{C}_{19}\text{H}_{10}\text{Cl}_2\text{NO}_2$ , 354.0089  $[\text{M} + \text{H}]^+$ ; found 354.0073.

4-(4-Bromophenyl)-2-oxo-2,5-dihydroindeno[1,2-b]pyran-3-carbonitrile (**3e**)

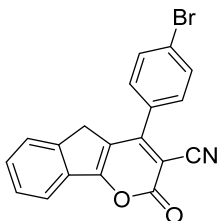

Yellow solid; mp 259 - 260 °C; IR (KBr,  $\nu$ ,  $\text{cm}^{-1}$ ) 2918, 2217, 1775, 1718, 1609, 1561, 1460, 1383, 1204, 1156, 828;  $^1\text{H}$  NMR (400 MHz,  $\text{DMSO-}d_6$ ;  $\delta$ , ppm) 7.87 (d,  $J = 8.4$  Hz, 3H, ArH), 7.71 (dd,  $J_1 = 12.8$ ,  $J_2 = 8.0$  Hz, 3H, ArH), 7.63-7.55 (m, 2H, ArH), 3.78 (s, 2H,  $\text{CH}_2$ );  $^{13}\text{C}$  NMR (100 MHz,  $\text{DMSO-}d_6$ ;  $\delta$ , ppm) 163.7, 160.9, 159.6, 145.5, 133.2, 132.1, 131.7, 131.2, 130.4, 128.1, 125.7, 125.0, 120.9, 118.1, 115.5, 93.3, 32.8; HRMS (ESI)  $m/z$  calc. for  $\text{C}_{19}\text{H}_{10}\text{BrNNO}_2$ , 385.9793  $[\text{M} + \text{Na}]^+$ ; found 385.9767.

4-(4-Cyanophenyl)-2-oxo-2,5-dihydroindeno[1,2-b]pyran-3-carbonitrile (**3f**)

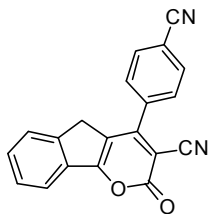

Yellow solid; mp > 300 °C; IR (KBr,  $\nu$ ,  $\text{cm}^{-1}$ ) 2946, 2224, 2214, 1636, 1614, 1588, 1562, 1490, 1355, 1231, 1156, 844, 772;  $^1\text{H}$  NMR (400 MHz,  $\text{DMSO}-d_6$ ;  $\delta$ , ppm) 8.19 (s, 1H, ArH), 8.09 (d,  $J = 8.0$  Hz, 2H, ArH), 7.88 (d,  $J = 8.0$  Hz, 2H, ArH), 7.63 (d,  $J = 6.8$  Hz, 1H, ArH), 7.57-7.47 (m, 2H, ArH), 3.66 (s, 2H,  $\text{CH}_2$ );  $^{13}\text{C}$  NMR (100 MHz,  $\text{DMSO}-d_6$ ;  $\delta$ , ppm) 169.4, 165.6, 162.2, 158.1, 146.6, 140.0, 133.2, 131.0, 129.8, 128.1, 126.0, 122.6, 122.5, 118.8, 117.1, 113.1, 34.1.; HRMS (ESI)  $m/z$  calc. for  $\text{C}_{20}\text{H}_{11}\text{N}_2\text{O}_2$ , 311.0821  $[\text{M}+\text{H}]^+$ ; found 311.0835.

2-Oxo-4-(*p*-tolyl)-2,5-dihydroindeno[1,2-b]pyran-3-carbonitrile (**3g**)

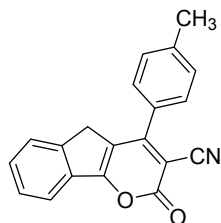

Yellow solid; mp 261-262 °C; IR (KBr,  $\nu$ ,  $\text{cm}^{-1}$ ) 3047, 2211, 1718, 1655, 1638, 1613, 1560, 1493, 1382, 1187, 1069, 837, 762;  $^1\text{H}$  NMR (400 MHz,  $\text{DMSO}-d_6$ ;  $\delta$ , ppm) 7.85 (d,  $J = 6.8$  Hz, 1H, ArH), 7.72-7.66 (m, 3H, ArH), 7.63-7.53 (m, 2H, ArH), 7.45 (d,  $J = 8.0$  Hz, 2H, ArH), 3.80 (s, 2H,  $\text{CH}_2$ ), 2.44 (s, 3H,  $\text{CH}_3$ );  $^{13}\text{C}$  NMR (100 MHz,  $\text{DMSO}-d_6$ ;  $\delta$ , ppm) 163.4, 162.1, 159.8, 145.5, 141.5, 133.3, 131.0, 130.2, 129.5, 128.4, 128.0, 125.7, 120.8, 118.2, 115.8, 92.9, 33.1, 21.0; HRMS (ESI)  $m/z$  calc. for  $\text{C}_{20}\text{H}_{14}\text{NO}_2$ , 300.1025  $[\text{M}+\text{H}]^+$ ; found 300.1035.

4-(4-Methoxyphenyl)-2-oxo-2,5-dihydroindeno[1,2-b]pyran-3-carbonitrile (**3h**)

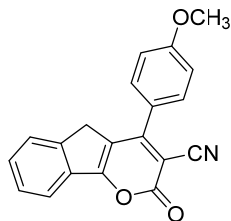

Yellow solid; mp 263-264 °C; IR (KBr,  $\nu$ ,  $\text{cm}^{-1}$ ) 2933, 2216, 1708, 1603, 1565, 1496, 1384, 1260, 1183, 1154, 840, 763, 726;  $^1\text{H}$  NMR (400 MHz,  $\text{DMSO}-d_6$ ;  $\delta$ , ppm) 7.85 (d,  $J = 6.8$  Hz, 1H, ArH), 7.79 (d,  $J = 8.8$  Hz, 2H, ArH), 7.70 (d,  $J = 7.3$  Hz, 1H, ArH), 7.63 – 7.54 (m, 2H, ArH), 7.19 (d,  $J = 8.8$  Hz, 2H, ArH), 3.89 (s, 3H,  $\text{OCH}_3$ ), 3.84 (s, 2H,  $\text{CH}_2$ );  $^{13}\text{C}$  NMR (100 MHz,  $\text{DMSO}-d_6$ ;  $\delta$ , ppm) 163.3, 161.7, 160.2, 159.9, 145.4, 133.3, 130.9, 130.5, 128.0, 125.6, 125.0, 120.8, 118.2, 116.0, 114.4, 92.3, 55.5, 33.2; HRMS (ESI)  $m/z$  calc. for  $\text{C}_{20}\text{H}_{14}\text{NO}_3$ ,

316.0974 [M+H]<sup>+</sup>; found 316.0946.

*4-(4-(tert-Butyl)phenyl)-2-oxo-2,5-dihydroindeno[1,2-b]pyran-3-carbonitrile (3i)*

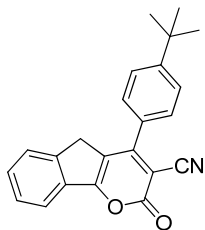

Yellow solid; mp 259-260 °C; IR (KBr,  $\nu$ ,  $\text{cm}^{-1}$ ) 3056, 2959, 2223, 1724, 1611, 1588, 1572, 1491, 1462, 1379, 1199, 835, 770; <sup>1</sup>H NMR(400 MHz, DMSO-*d*<sub>6</sub>;  $\delta$ , ppm) 7.85 (d,  $J$  = 7.2 Hz, 1H, ArH), 7.75 (d,  $J$  = 8.4 Hz, 2H, ArH), 7.71-7.66 (m, 3H, ArH), 7.63-7.54 (m, 2H, ArH), 3.83 (s, 2H, CH<sub>2</sub>), 1.36 (s, 9H, CH<sub>3</sub>); <sup>13</sup>C NMR (100 MHz, DMSO-*d*<sub>6</sub>;  $\delta$ , ppm) 163.9, 162.4, 160.3, 154.7, 146.1, 133.7, 131.5, 130.7, 128.8, 128.5, 126.3, 126.2, 121.3, 118.8, 116.4, 93.3, 35.3, 33.7, 31.4.; HRMS (ESI)  $m/z$  calc. for C<sub>23</sub>H<sub>20</sub>NO<sub>2</sub>, 342.1494 [M+H]<sup>+</sup>; found 342.1486.

*4-(3-Hydroxyphenyl)-2-oxo-2,5-dihydroindeno[1,2-b]pyran-3-carbonitrile (3j)*

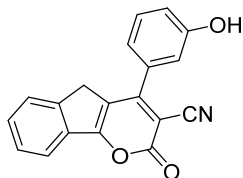

Yellow solid; mp 247-248 °C; IR (KBr,  $\nu$ ,  $\text{cm}^{-1}$ ) 3048, 2225, 1726, 1699, 1561, 1494, 1386, 1198, 1150, 765, 730, 611; <sup>1</sup>H NMR (400 MHz, DMSO-*d*<sub>6</sub>;  $\delta$ , ppm) 10.05 (s, 1H, OH), 7.80 (d,  $J$  = 7.6 Hz, 1H, ArH), 7.68 (d,  $J$  = 7.2 Hz, 1H, ArH), 7.62-7.49 (m, 2H, ArH), 7.43 (t,  $J$  = 8.0 Hz, 1H, ArH), 7.14 (d,  $J$  = 7.6 Hz, 1H, ArH), 7.09 (s, 1H, ArH), 7.02 (dd,  $J_1$  = 8.0,  $J_2$  = 1.6 Hz, 1H, ArH), 3.71 (s, 2H, CH<sub>2</sub>); <sup>13</sup>C NMR (100 MHz, DMSO-*d*<sub>6</sub>;  $\delta$ , ppm) 163.5, 162.0, 159.7, 157.6, 145.3, 134.1, 133.2, 130.9, 130.1, 127.9, 125.6, 120.7, 118.7, 118.1, 118.0, 115.5, 114.8, 93.0, 33.0; HRMS (ESI)  $m/z$  calc. for C<sub>19</sub>H<sub>12</sub>NO<sub>3</sub>, 302.0817 [M+H]<sup>+</sup>; found 302.0814.

*2-Oxo-4-(thiophen-2-yl)-2,5-dihydroindeno[1,2-b]pyran-3-carbonitrile (3k)*

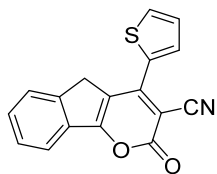

Yellow solid; mp 235-236 °C; IR (KBr,  $\nu$ ,  $\text{cm}^{-1}$ ) 3068, 2220, 1728, 1559, 1479, 1422, 1151, 785, 764, 726; <sup>1</sup>H NMR (400 MHz, DMSO-*d*<sub>6</sub>;  $\delta$ , ppm) 8.23 (s, 1H, ArH), 8.13 (s, 1H, ArH), 7.82 (d,  $J$  = 6.4 Hz, 1H, ArH), 7.74 (d,

$J = 6.4$  Hz, 1H, ArH), 7.61-7.56 (m, 2H, ArH), 7.44 (s, 1H, ArH), 4.05 (s, 2H, CH<sub>2</sub>); <sup>13</sup>C NMR (100 MHz, DMSO-*d*<sub>6</sub>;  $\delta$ , ppm) 163.4, 159.9, 153.0, 145.0, 134.3, 134.0, 133.3, 133.1, 131.1, 128.8, 128.0, 125.5, 121.8, 120.7, 116.7, 89.9, 34.5; HRMS (ESI)  $m/z$  calc. for C<sub>17</sub>H<sub>10</sub>NO<sub>2</sub>S, 292.0426 [M+H]<sup>+</sup>; found 292.0436.

Example for the synthesis of **3I**: *2-Oxo-4-phenyl-2,5-dihydro benzo[5,6]indeno[1,2-b]pyran-3-carbonitrile*

Naphthalene-2,3-dicarbaldehyde **1b** (1.0 mmol) was introduced in a 50-mL round flask, 2-(1-phenylethylidene) malononitrile (**2a**, 1.0 mmol), Et<sub>3</sub>N (1.0 mmol), and DMF (8.0 mL) were then successively added and stirred at 0 °C for 24 hours. After the completion of the reaction (monitored by TLC), the reaction mixture was diluted with cold water (20 mL). The solid product was collected by Büchner filtration and was purified by recrystallization from 95% EtOH to afford the desired pure indeno[1,2-*b*]pyrans **3I** as a yellow solid

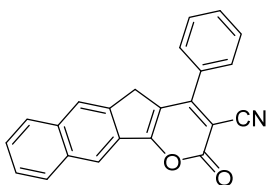

Yellow solid; mp 247-248 °C; IR (KBr,  $\nu$ , cm<sup>-1</sup>) 3054, 2223, 1731, 1573, 1496, 1440, 1329, 1145, 875, 748; <sup>1</sup>H NMR (400 MHz, DMSO-*d*<sub>6</sub>;  $\delta$ , ppm) 8.45 (s, 1H, ArH), 8.21-8.10 (m, 2H, ArH), 8.01 (d,  $J = 7.6$  Hz, 1H, ArH), 7.83-7.78 (m, 2H, ArH), 7.69-7.66 (m, 3H, ArH), 7.62 (d,  $J = 2.0$  Hz, 1H, ArH), 7.59 (d,  $J = 6.8$  Hz, 1H, ArH), 3.87 (s, 2H, CH<sub>2</sub>); <sup>13</sup>C NMR (100 MHz, DMSO-*d*<sub>6</sub>;  $\delta$ , ppm) 162.9, 162.0, 159.5, 139.6, 134.0, 133.0, 132.1, 131.5, 131.2, 129.1, 128.9, 128.2, 127.9, 127.8, 126.4, 124.0, 120.6, 119.3, 115.6, 94.4, 32.1; HRMS (ESI)  $m/z$  calc. for C<sub>23</sub>H<sub>14</sub>NO<sub>2</sub>Na, 358.0844[M+Na]<sup>+</sup>; found 358.0840.

*2-Oxo-4-fluorophenyl-2,5-dihydrobenzo[5,6]indeno[1,2-b]pyran-3- carbonitrile (3m)*

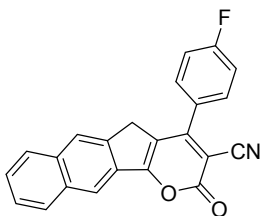

Yellow solid; mp 292-293 °C; IR (KBr,  $\nu$ , cm<sup>-1</sup>) 3063, 2223, 1729, 1573, 1493, 1417, 1227, 1160, 1101, 851; <sup>1</sup>H NMR (400 MHz, DMSO-*d*<sub>6</sub>;  $\delta$ , ppm) 8.45 (s, 1H, ArH), 8.19-8.12 (m, 2H, ArH), 8.02 (d,  $J = 7.6$  Hz, 1H, ArH), 7.93-7.86 (m, 2H, ArH), 7.64-7.60 (m, 2H, ArH), 7.53 (t,  $J = 8.8$  Hz, 2H, ArH), 3.88 (s, 2H, CH<sub>2</sub>); <sup>13</sup>C NMR (100 MHz, DMSO-*d*<sub>6</sub>;  $\delta$ , ppm) 164.6 ( $J_{CF} = 220.0$  Hz), 162.9, 161.4, 159.5, 139.3, 134.0, 131.5, 131.1, 131.0, 129.1, 127.9 ( $J_{CF} = 8.9$  Hz), 127.0, 126.5, 124.0 ( $J_{CF} = 2.3$  Hz), 121.2, 120.6, 119.4, 116.1 ( $J_{CF} = 21.8$  Hz), 115.5, 112.6, 94.6, 32.4; HRMS (ESI)  $m/z$  calc. for C<sub>23</sub>H<sub>12</sub>FNO<sub>2</sub>Na, 376.0750 [M+Na]<sup>+</sup>; found 376.0752.

2-Oxo-4-chlorophenyl-2,5-dihydrobenzo[5,6]indeno[1,2-b]pyran-3- carbonitrile (**3n**)

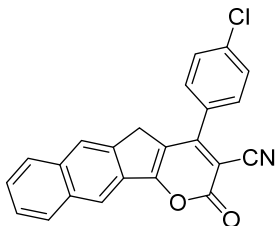

Yellow solid; mp 254-256 °C; IR (KBr,  $\nu$ ,  $\text{cm}^{-1}$ ) 3083, 2221, 1716, 1634, 1455, 1397, 1065, 875, 765;  $^1\text{H}$  NMR (400 MHz,  $\text{DMSO-}d_6$ ;  $\delta$ , ppm) 8.42 (s, 1H, ArH), 8.19-8.09 (m, 2H, ArH), 8.00 (d,  $J = 8.0$  Hz, 1H, ArH), 7.83 (d,  $J = 8.0$  Hz, 2H ArH), 7.76 (d,  $J = 7.6$  Hz, 2H, ArH), 7.64-7.58 (m, 2H, ArH), 3.83 (s, 2H,  $\text{CH}_2$ );  $^{13}\text{C}$  NMR (100 MHz,  $\text{DMSO-}d_6$ ;  $\delta$ , ppm) 163.1, 160.8, 159.4, 147.7, 139.7, 136.3, 134.1, 132.2, 131.8, 131.5, 130.3, 129.2, 128.0, 126.5, 124.1, 120.7, 119.4, 115.5, 112.7, 94.6, 32.1; HRMS (ESI)  $m/z$  calc. for  $\text{C}_{23}\text{H}_{12}\text{ClNO}_2\text{Na}$ , 392.0454  $[\text{M}+\text{Na}]^+$ ; found 392.0454.

2-Oxo-4- bromophenyl-2,5-dihydrobenzo[5,6]indeno[1,2-b]pyran-3- carbonitrile (**3o**)

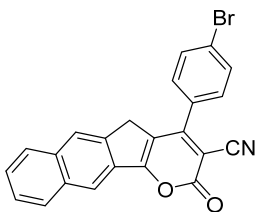

Yellow solid; mp 269-270 °C; IR (KBr,  $\nu$ ,  $\text{cm}^{-1}$ ) 3057, 2220, 1743, 1687, 1507, 1401, 1169, 889, 787;  $^1\text{H}$  NMR (400 MHz,  $\text{DMSO-}d_6$ ;  $\delta$ , ppm) 8.42 (s, 1H, ArH), 8.18-8.09 (m, 2H, ArH), 8.00 (d,  $J = 8.0$  Hz, 1H, ArH), 7.89 (d,  $J = 8.4$  Hz, 2H ArH), 7.75 (d,  $J = 8.4$  Hz, 2H, ArH), 7.67-7.55 (m, 2H, ArH), 3.82 (s, 2H,  $\text{CH}_2$ );  $^{13}\text{C}$  NMR (100 MHz,  $\text{DMSO-}d_6$ ;  $\delta$ , ppm) 163.0, 160.8, 159.3, 139.6, 134.0, 132.1, 132.1, 132.0, 131.4, 130.3, 129.1, 127.9, 127.9, 126.4, 125.0, 124.0, 120.6, 119.1, 115.3, 94.4, 32.0; HRMS (ESI)  $m/z$  calc. for  $\text{C}_{23}\text{H}_{12}\text{BrNO}_2\text{Na}$ , 435.9944  $[\text{M}+\text{Na}]^+$ ; found 435.9949.

2-Oxo- *p*-tolyl -2,5-dihydrobenzo[5,6]indeno[1,2-b]pyran-3- carbonitrile (**3p**)

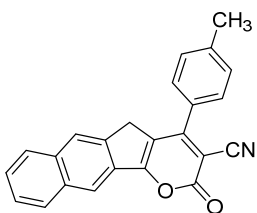

Yellow solid; mp 232-234 °C; IR (KBr,  $\nu$ ,  $\text{cm}^{-1}$ ) 3012, 2222, 1714, 1615, 1498, 1432, 1289, 876, 799;  $^1\text{H}$  NMR (400 MHz,  $\text{DMSO-}d_6$ ;  $\delta$ , ppm) 8.42 (s, 1H, ArH), 8.13 (t,  $J = 8.8$  Hz, 2H, ArH), 8.00 (d,  $J = 7.7$  Hz, 1H, ArH), 7.70 (d,  $J = 8.0$  Hz, 2H, ArH), 7.64-7.57 (m, 2H, ArH), 7.48 (d,  $J = 8.0$  Hz, 2H, ArH), 3.86 (s, 2H,  $\text{CH}_2$ ), 2.45 (s,



3H, CH<sub>3</sub>); <sup>13</sup>C NMR (100 MHz, DMSO-*d*<sub>6</sub>; δ, ppm) 162.7, 162.0, 159.6, 141.4, 139.6, 134.0, 132.1, 131.5, 130.1, 129.5, 129.0, 128.3, 127.9, 127.8, 126.4, 123.9, 120.5, 119.3, 115.6, 94.2, 32.2, 21.0; HRMS (ESI) *m/z* calc. for C<sub>24</sub>H<sub>15</sub>NO<sub>2</sub>Na, 372.1000 [M+Na]<sup>+</sup>; found 372.0998.

*2-oxo-3-hydroxyphenyl-2,5-dihydrobenzo[5,6]indeno[1,2-b]pyran-3-carbonitrile (3q)*

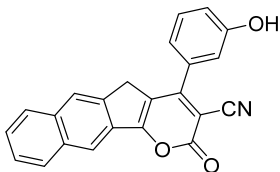

Yellow solid; mp 298-299 °C; IR (KBr, ν, cm<sup>-1</sup>) 3412, 2220, 1768, 1621, 1497, 1354, 1187, 885;

<sup>1</sup>H NMR (400 MHz, DMSO-*d*<sub>6</sub>; δ, ppm) 10.03 (s, 1H, OH), 8.35 (s, 1H, ArH), 8.14-8.06 (m, 2H, ArH), 7.97 (d, *J* = 7.6 Hz, 1H, ArH), 7.59 (t, *J* = 8.0 Hz, 2H, ArH), 7.46 (t, *J* = 7.6 Hz, 1H, ArH), 7.16 (d, *J* = 7.2 Hz, 1H, ArH), 7.12 (s, 1H, ArH), 7.05 (d, *J* = 8.0 Hz, 1H, ArH), 3.77 (s, 2H, CH<sub>2</sub>); <sup>13</sup>C NMR (100 MHz, DMSO-*d*<sub>6</sub>; δ, ppm) 162.9, 162.0, 159.6, 157.6, 139.6, 134.2, 134.0, 132.1, 131.6, 130.3, 129.1, 128.0, 127.8, 124.0, 120.5, 119.3, 118.1, 115.5, 114.8, 94.2, 32.3; HRMS (ESI) *m/z* calc. for C<sub>23</sub>H<sub>13</sub>NNaO<sub>3</sub>, 374.0793 [M+Na]<sup>+</sup>; found 374.0779.

*2-Oxo-(thiophen-2-yl)-2,5-dihydrobenzo[5,6]indeno[1,2-b]pyran-3-carbonitrile (3r)*

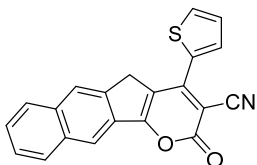

Yellow solid; mp 243-244 °C; IR (KBr, ν, cm<sup>-1</sup>) 3012, 2220, 1768, 1621, 1497, 1354, 1187, 885; <sup>1</sup>H NMR (400 MHz, DMSO-*d*<sub>6</sub>; δ, ppm) 8.39 (s, 1H, ArH), 8.27 (s, 1H, ArH), 8.13 (d, *J* = 9.8 Hz, 3H, ArH), 8.01 (d, *J* = 8.4 Hz, 1H, ArH), 7.66 – 7.54 (m, 3H, ArH), 7.46 (s, 1H, ArH), 4.10 (s, 2H, CH<sub>2</sub>); <sup>13</sup>C NMR (100 MHz, DMSO-*d*<sub>6</sub>; δ, ppm) 163.6, 162.9, 159.8, 139.3, 134.1, 133.3, 132.2, 131.5, 129.8, 129.1, 128.8, 128.8, 128.0, 127.0, 126.5, 120.6, 118.0, 115.2, 105.7, 91.0, 31.6; HRMS (ESI) *m/z* calc. for C<sub>21</sub>H<sub>12</sub>NO<sub>2</sub>S 342.0583 [M+H]<sup>+</sup>; found 342.0589.

*2-Oxo-3,4-dichlorophenyl-2,5-dihydrobenzo[5,6]indeno[1,2-b]pyran-3-carbonitrile (3s)*

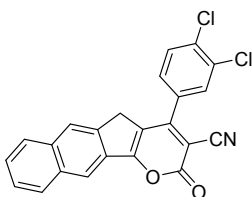

Yellow solid; mp 295-297 °C; IR (KBr,  $\nu$ ,  $\text{cm}^{-1}$ ) 3051, 2220, 1768, 1621, 1497, 1354, 1187, 885;  $^1\text{H}$  NMR (400 MHz,  $\text{DMSO-}d_6$ ;  $\delta$ , ppm) 8.48 (s, 1H, ArH), 8.15 (t,  $J = 8.0$  Hz, 3H, ArH), 8.03 (d,  $J = 7.2$  Hz, 1H, ArH), 7.97 (d,  $J = 8.4$  Hz, 1H, ArH), 7.80 (d,  $J = 9.2$  Hz, 1H, ArH), 7.66 – 7.60 (m, 2H, ArH), 3.90 (s, 2H,  $\text{CH}_2$ );  $^{13}\text{C}$  NMR (100 MHz,  $\text{DMSO-}d_6$ ;  $\delta$ , ppm) 163.3, 159.4, 159.2, 139.6, 134.2, 134.1, 133.4, 132.1, 132.0, 131.4, 131.4, 130.1, 129.2, 128.6, 128.0, 128.0, 126.5, 124.1, 120.8, 119.2, 115.2, 95.0, 31.9; HRMS (ESI)  $m/z$  calc. for  $\text{C}_{23}\text{H}_{12}\text{Cl}_2\text{NO}_2$ , 404.0240  $[\text{M}+\text{H}]^+$ ; found 404.0249.

Copies of  $^1\text{H}$  NMR and  $^{13}\text{C}$  NMR of Compounds 3

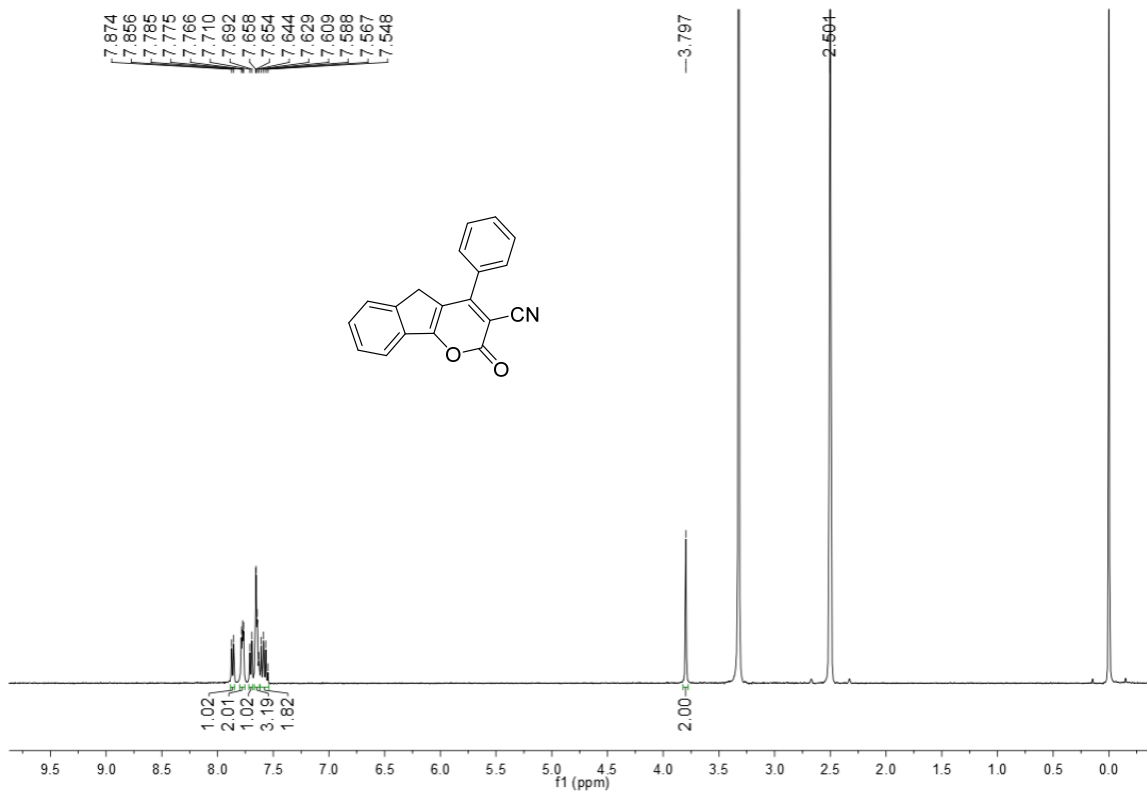

$^1\text{H}$  NMR Spectrum of Compound 3a

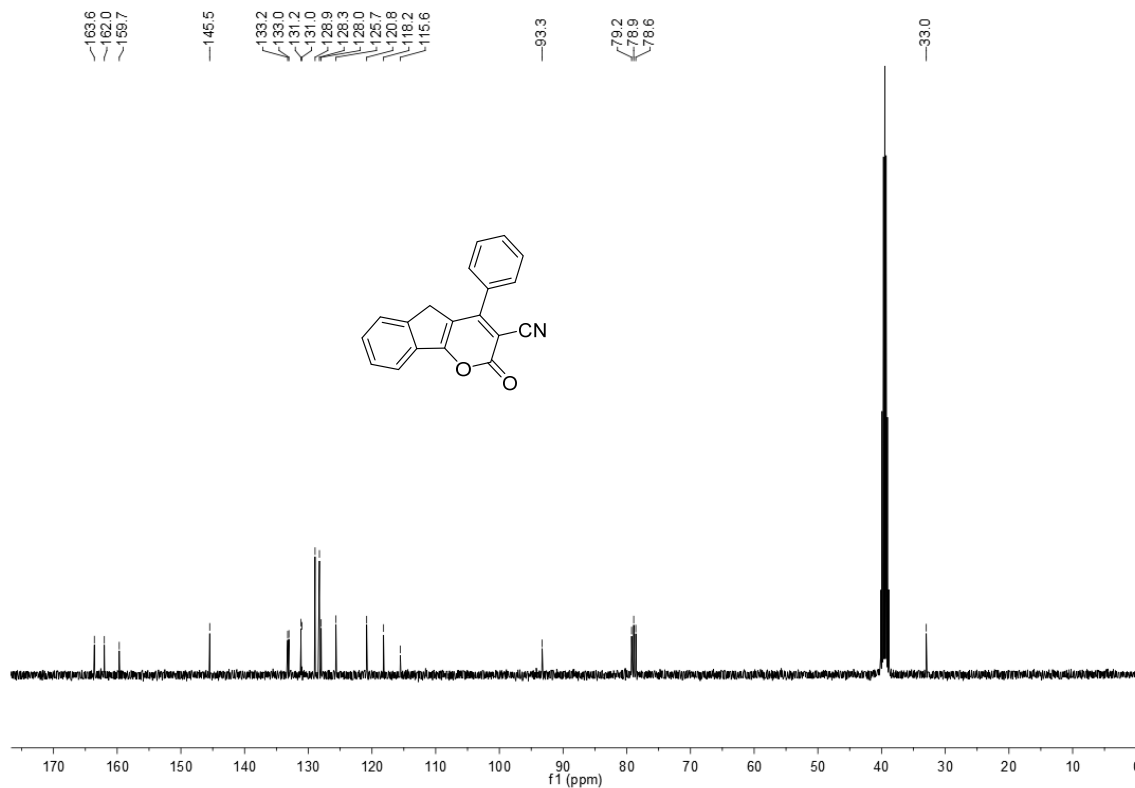

$^{13}\text{C}$  NMR Spectrum of Compound 3a

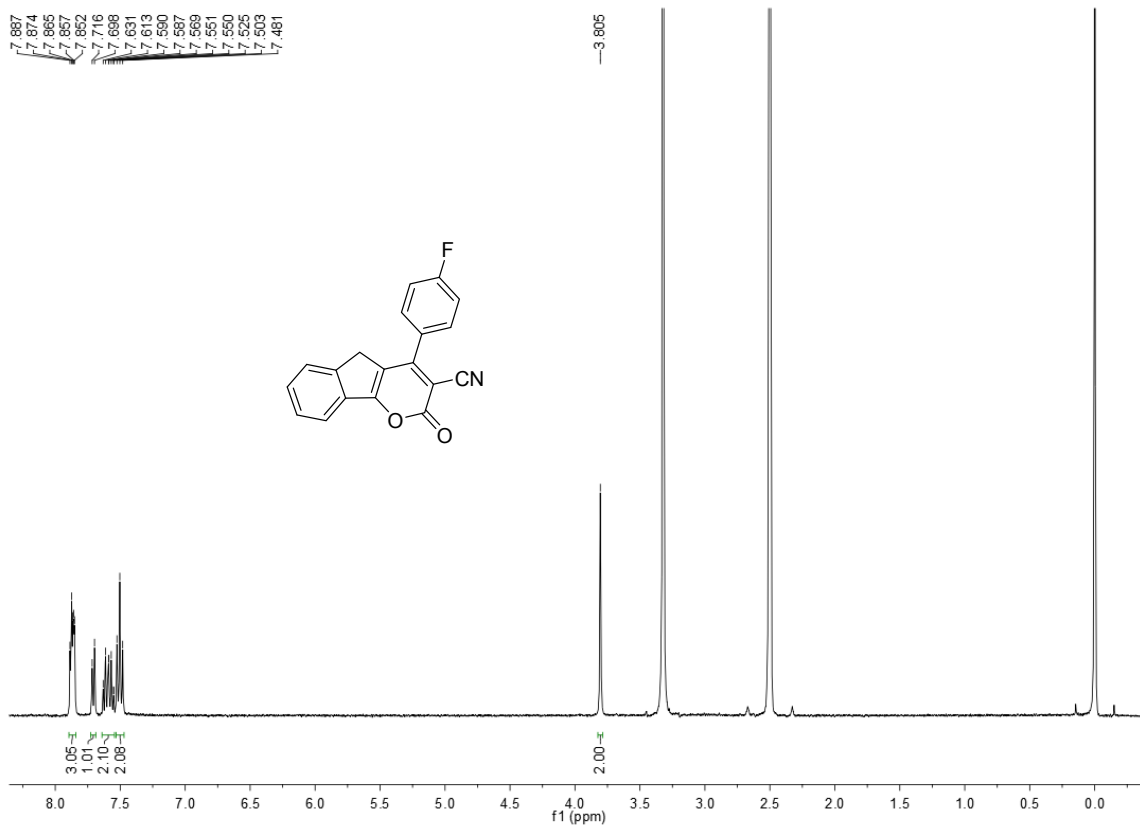

**<sup>1</sup>H NMR Spectrum of Compound 3b**

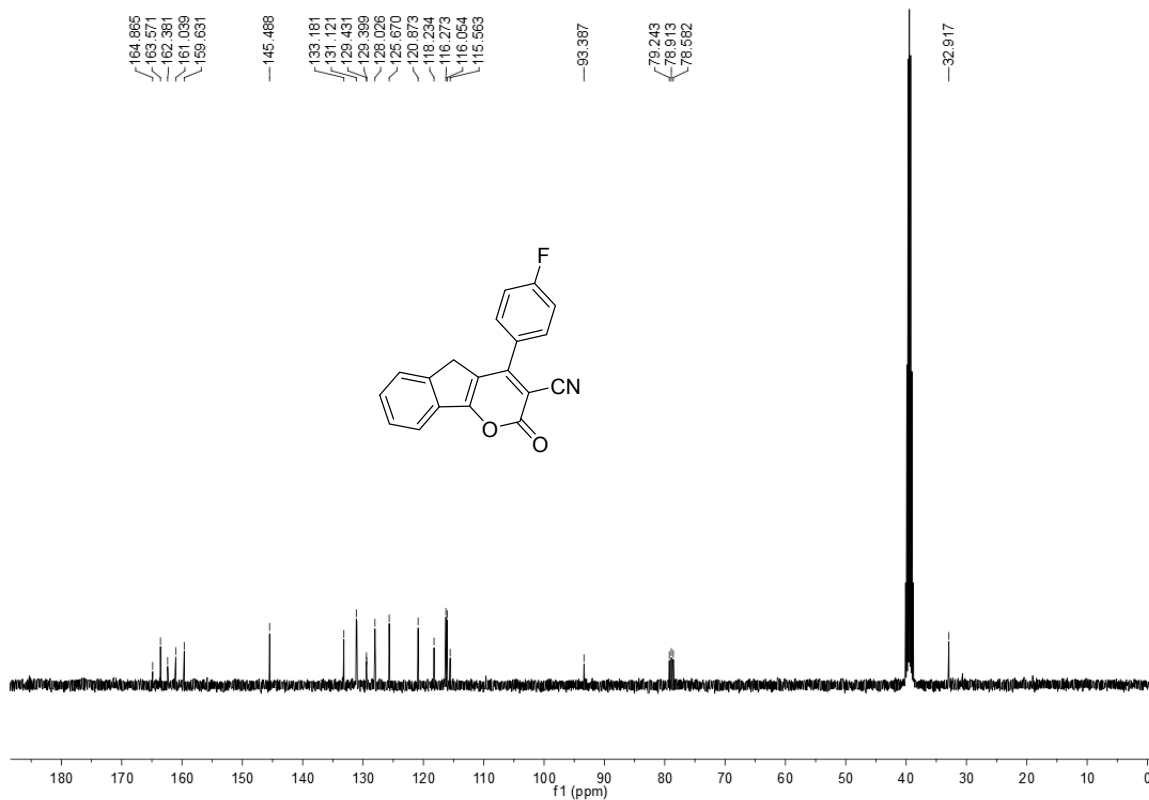

**<sup>13</sup>C NMR Spectrum of Compound 3b**

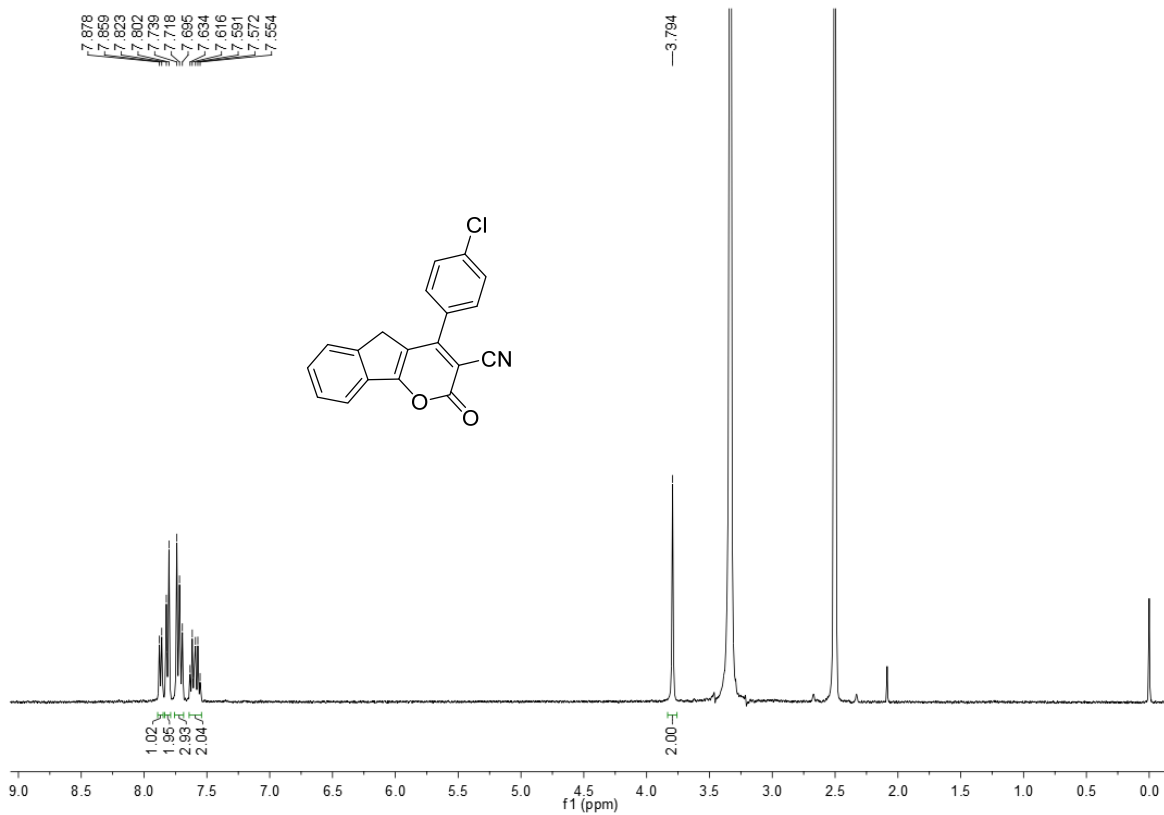

**<sup>1</sup>H NMR Spectrum of Compound 3c**

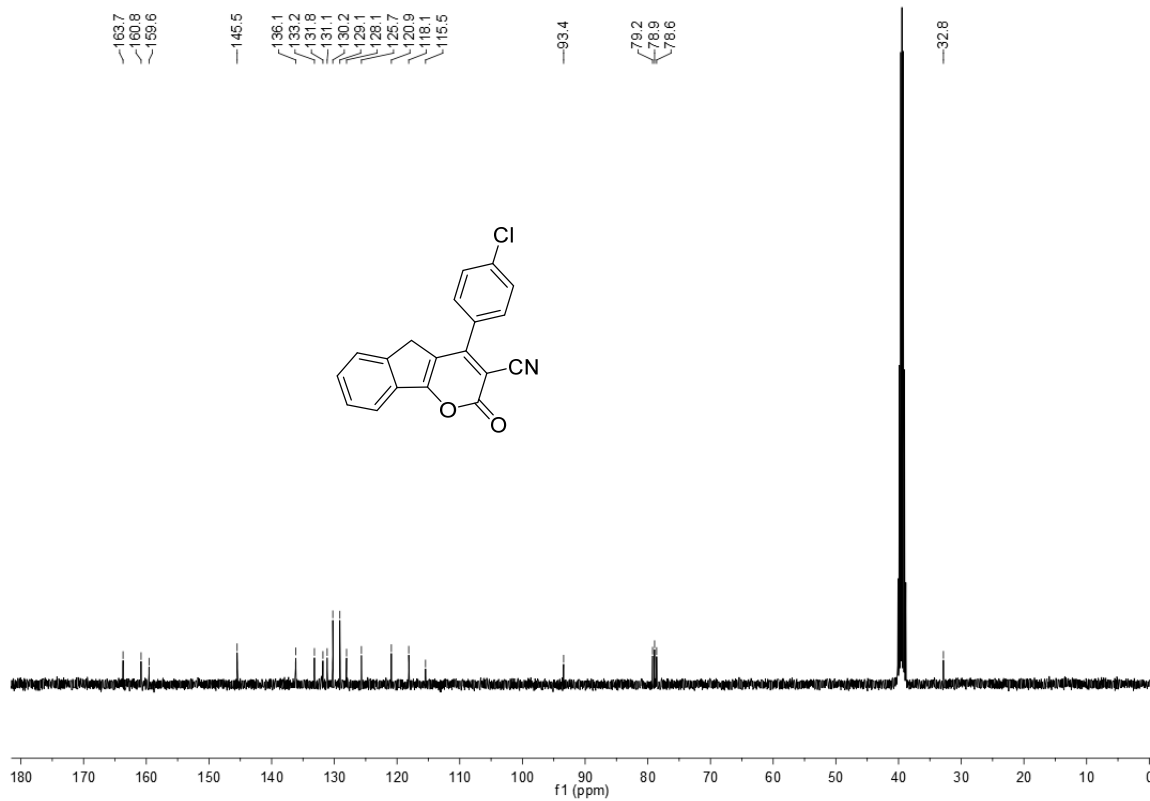

**<sup>13</sup>C NMR Spectrum of Compound 3c**

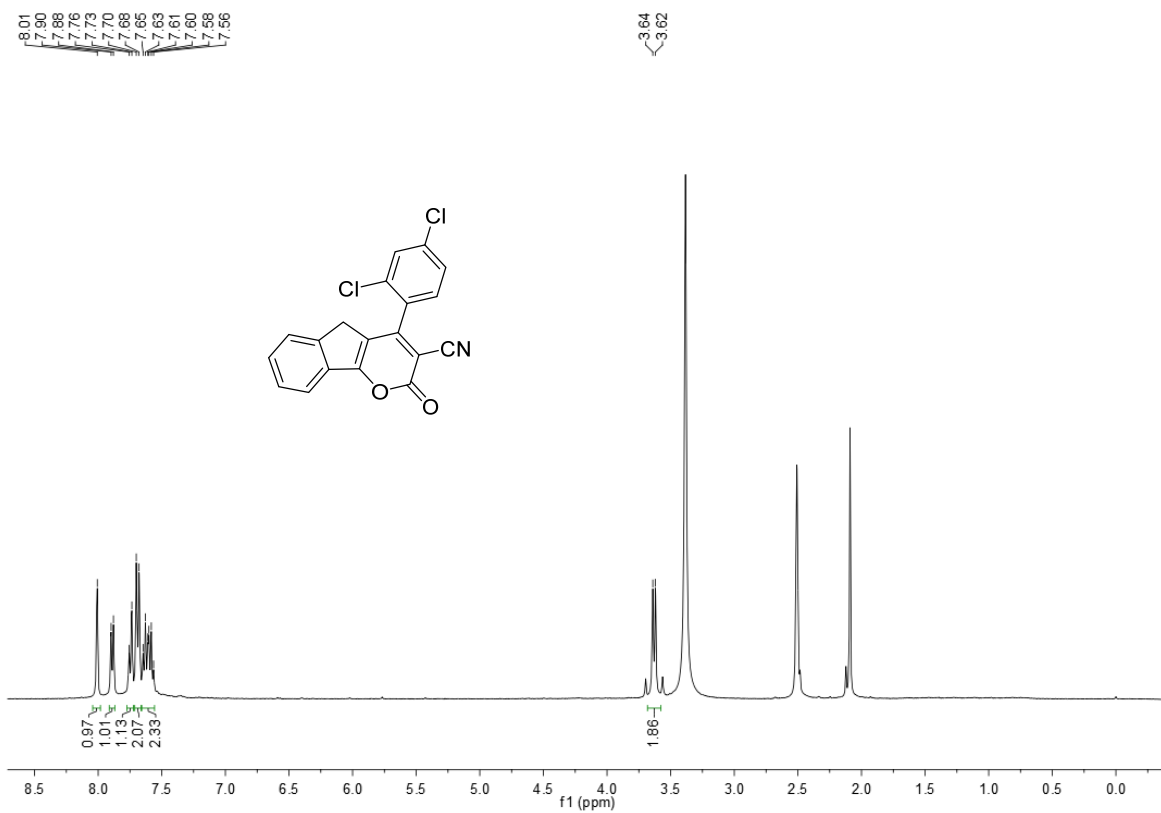

<sup>1</sup>H NMR Spectrum of Compound 3d

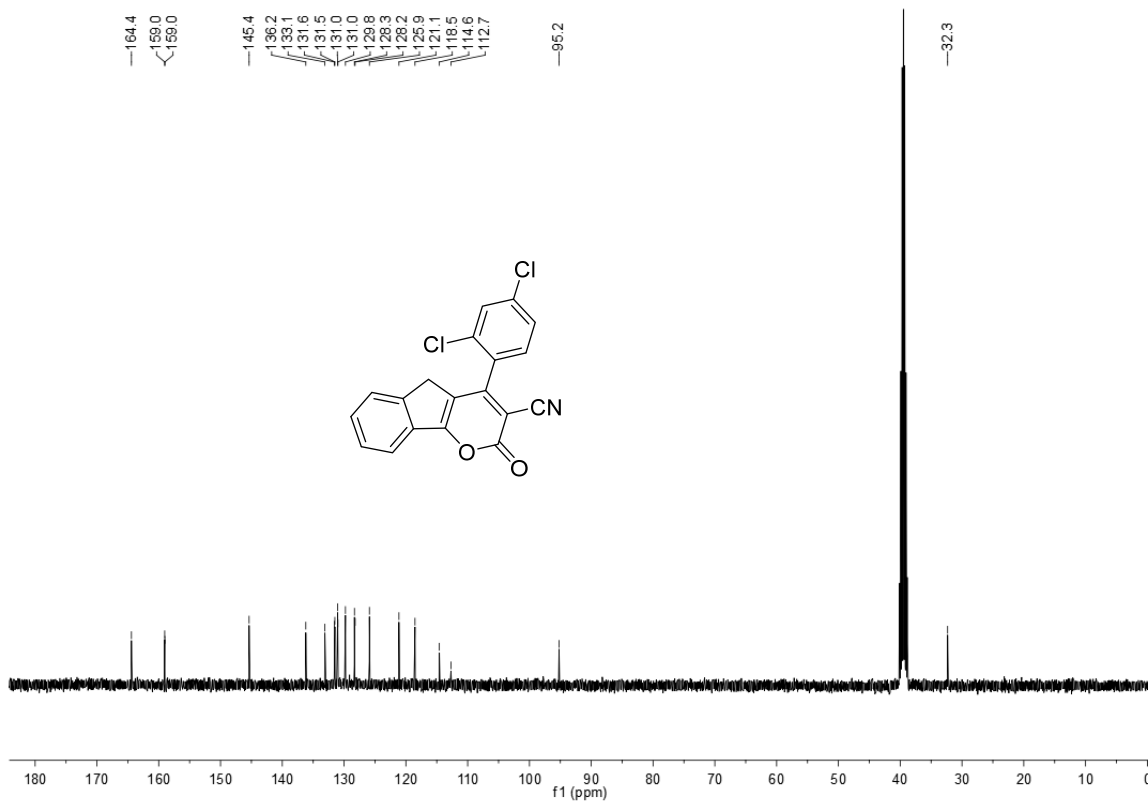

<sup>13</sup>C NMR Spectrum of Compound 3d

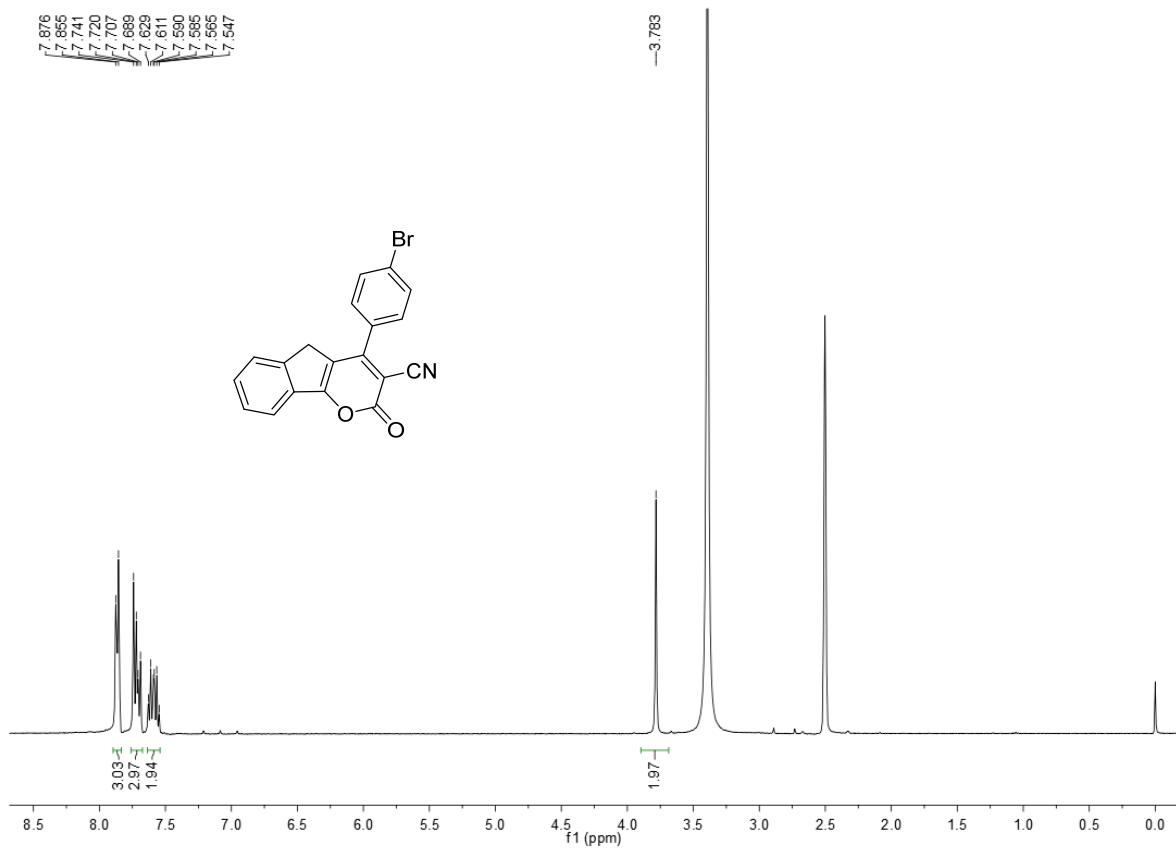

**<sup>1</sup>H NMR Spectrum of Compound 3e**

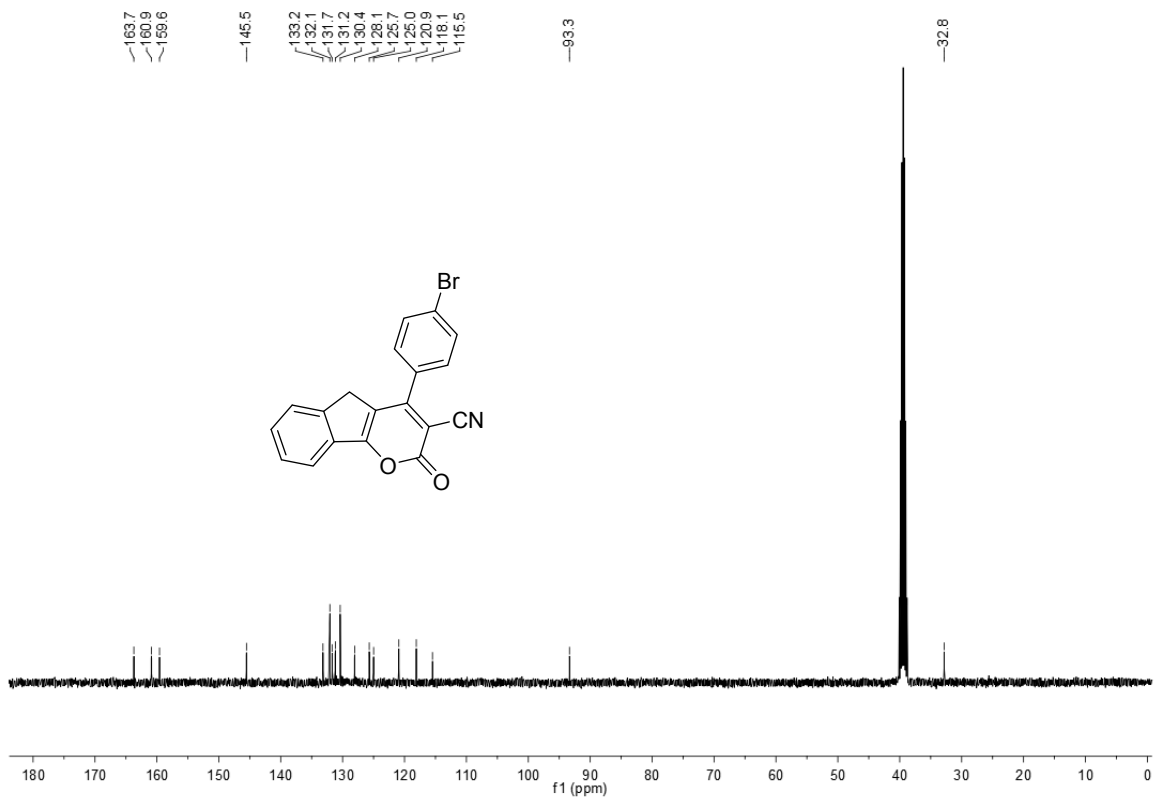

**<sup>13</sup>C NMR Spectrum of Compound 3e**

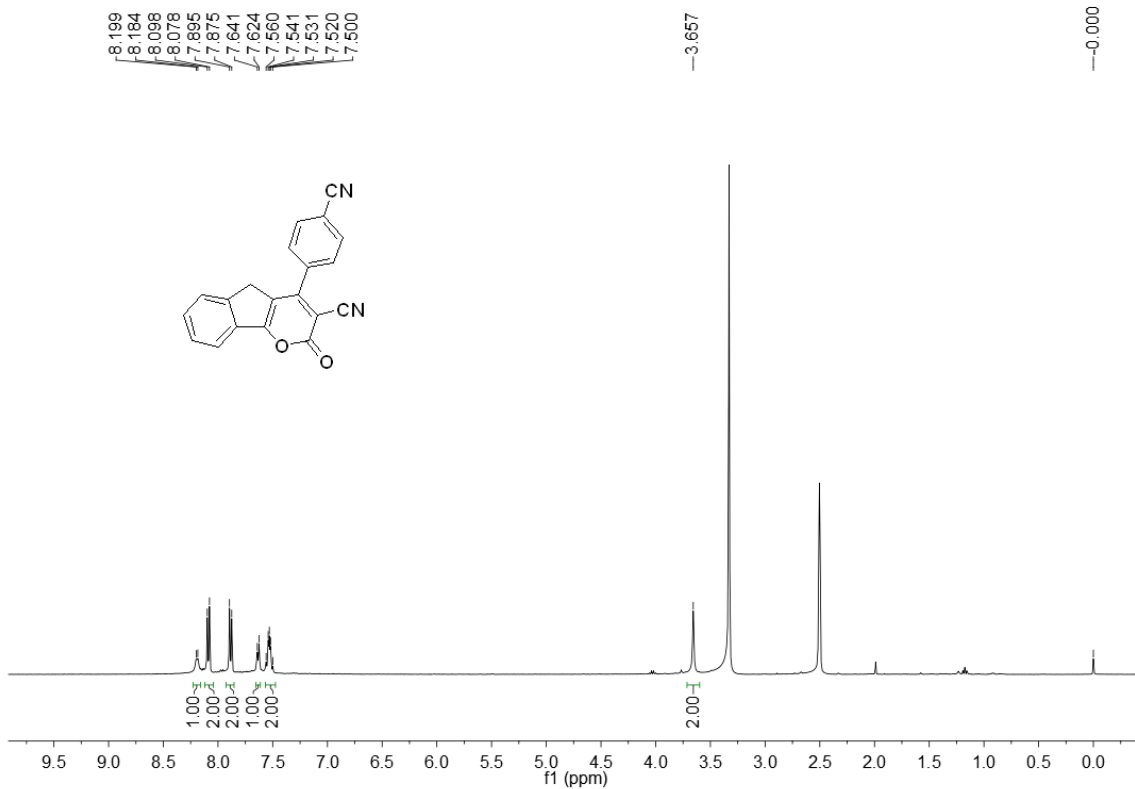

<sup>1</sup>H NMR Spectrum of Compound 3f

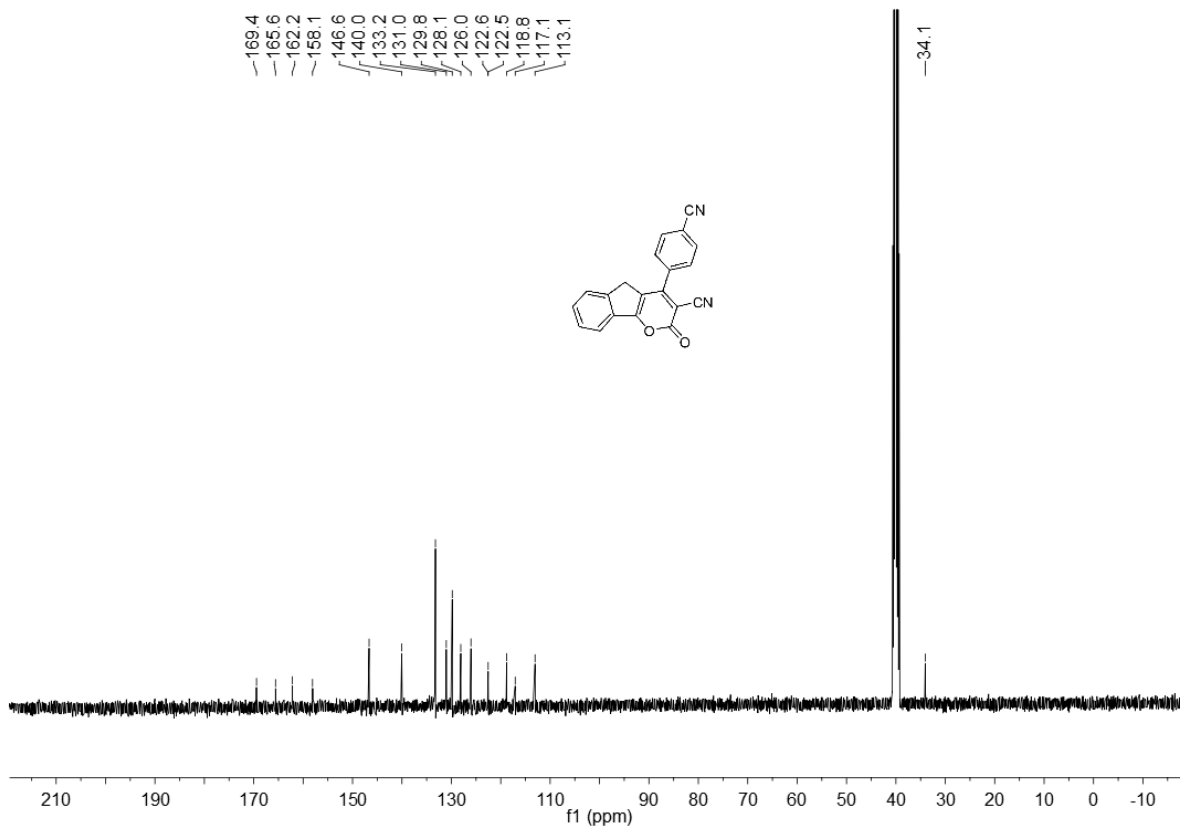

<sup>13</sup>C NMR Spectrum of Compound 3f



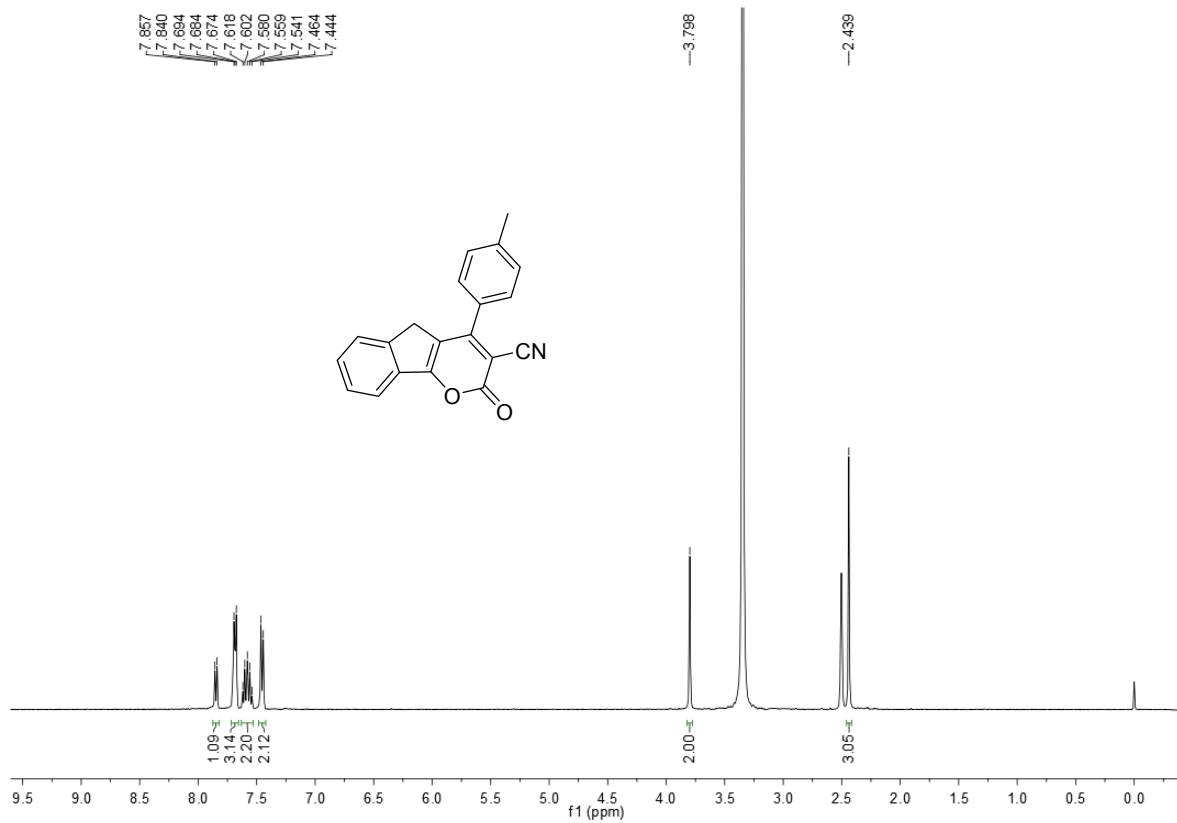

**<sup>1</sup>H NMR Spectrum of Compound 3g**

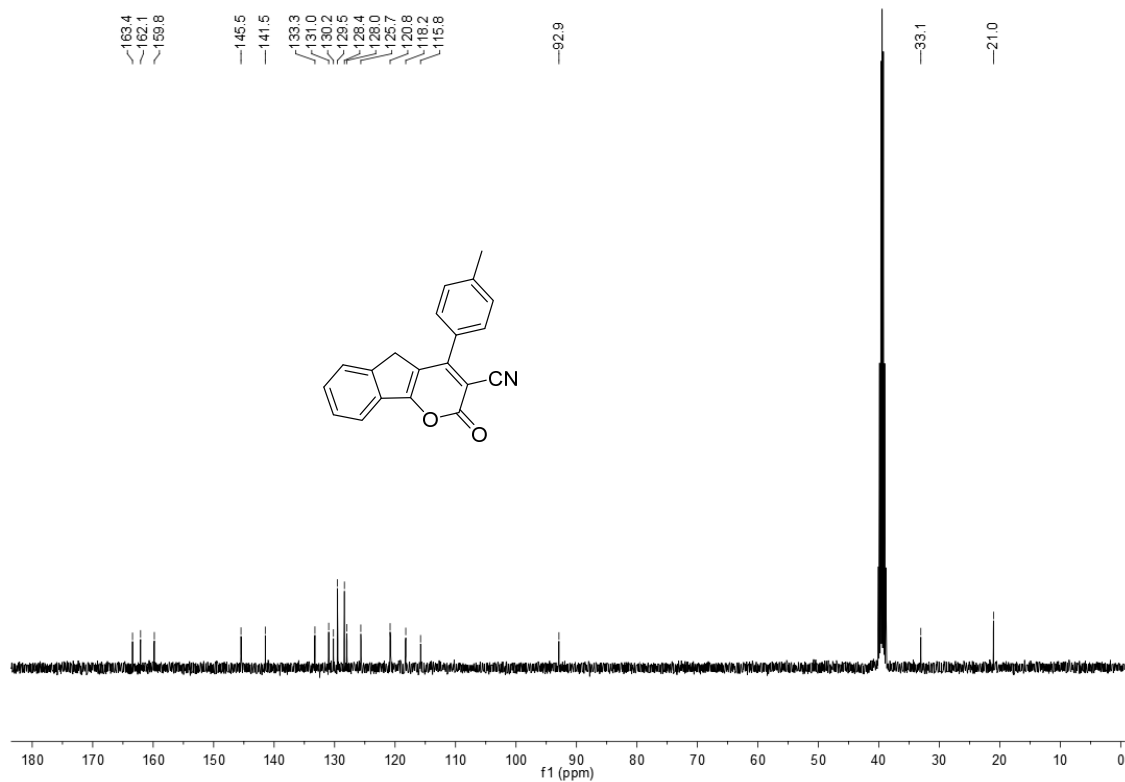

**<sup>13</sup>C NMR Spectrum of Compound 3g**

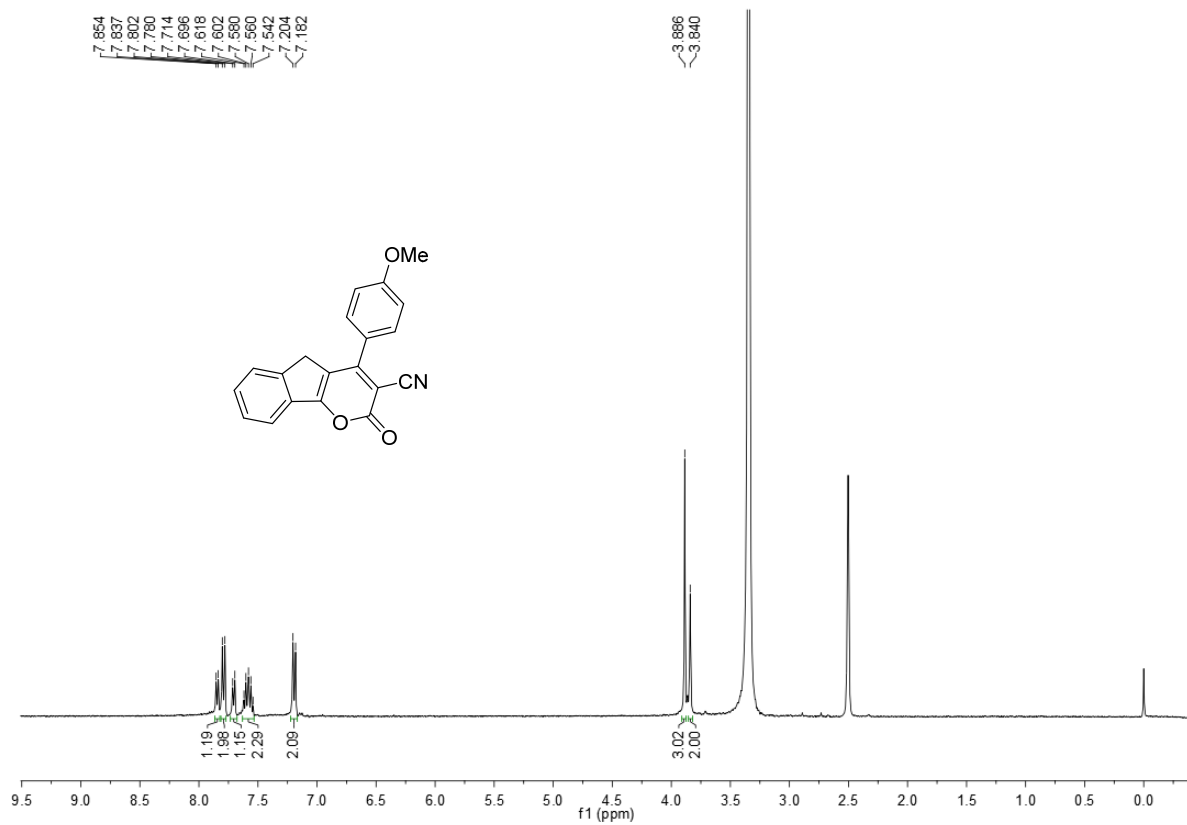

**<sup>1</sup>H NMR Spectrum of Compound 3h**

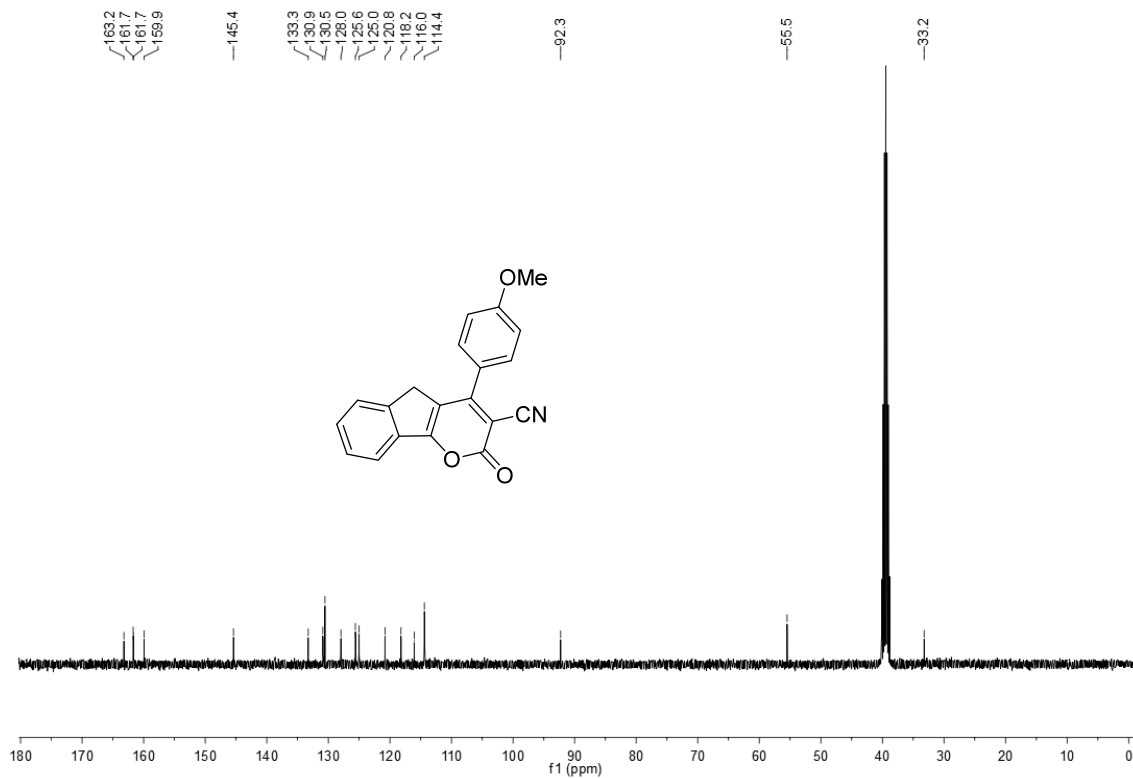

**<sup>13</sup>C NMR Spectrum of Compound 3h**

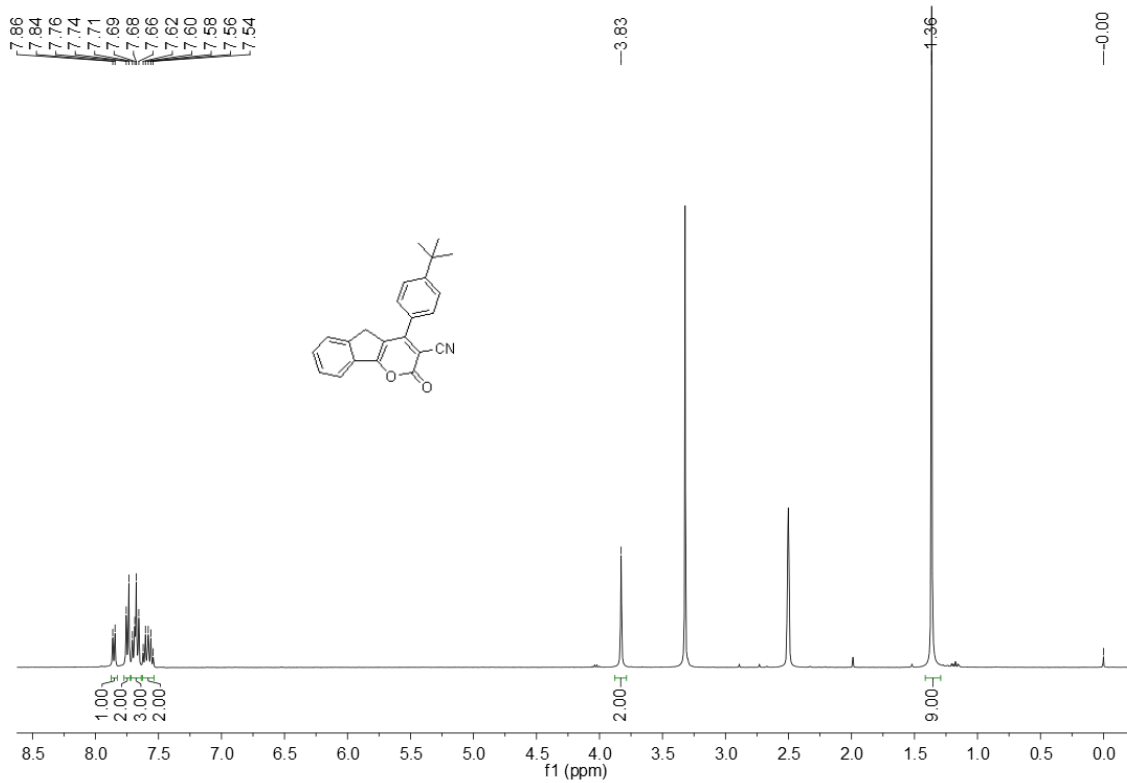

**<sup>1</sup>H NMR Spectrum of Compound 3i**

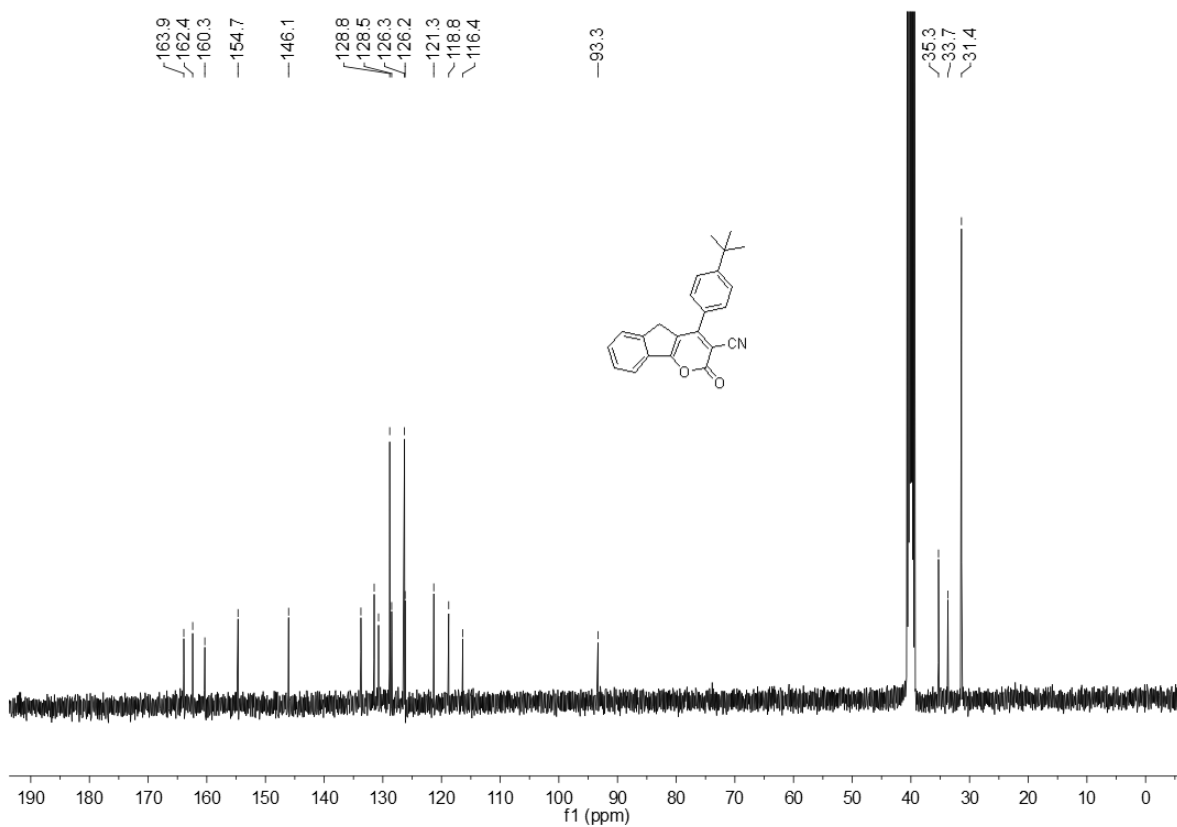

**<sup>13</sup>C NMR Spectrum of Compound 3i**

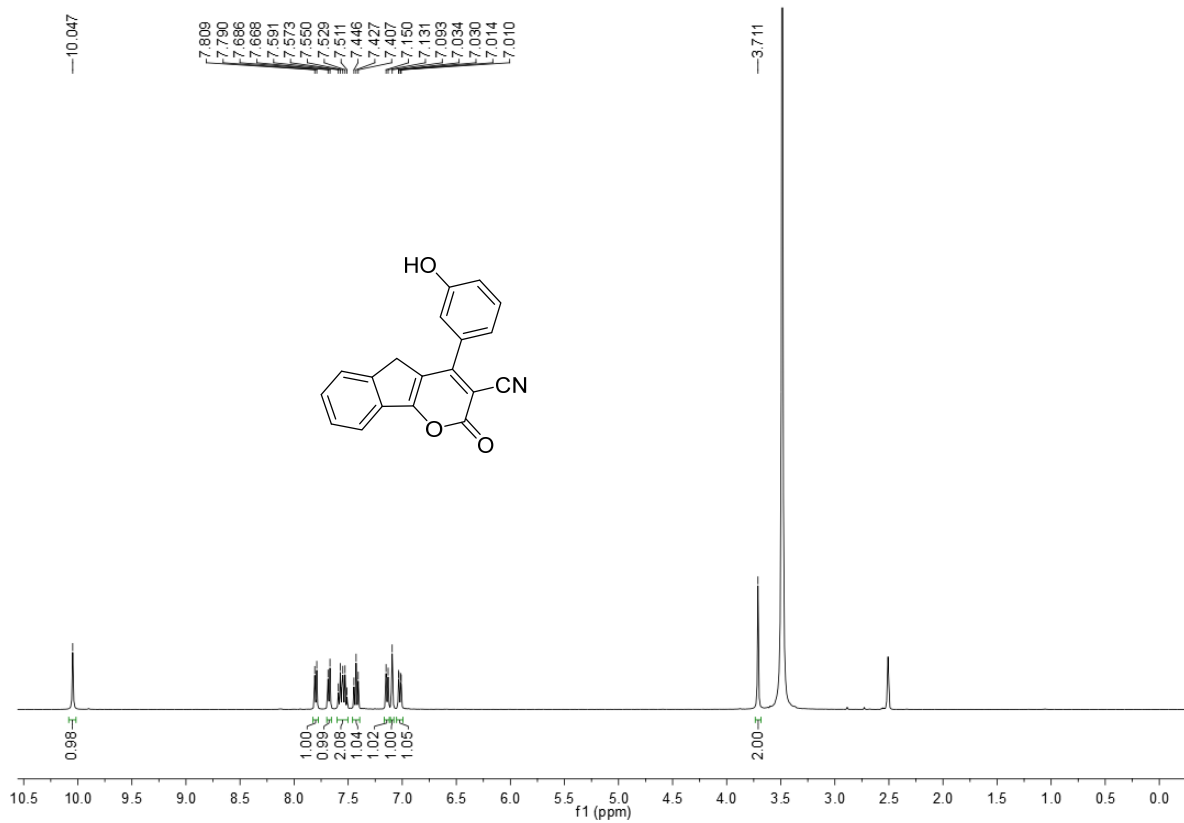

**<sup>1</sup>H NMR Spectrum of Compound 3j**

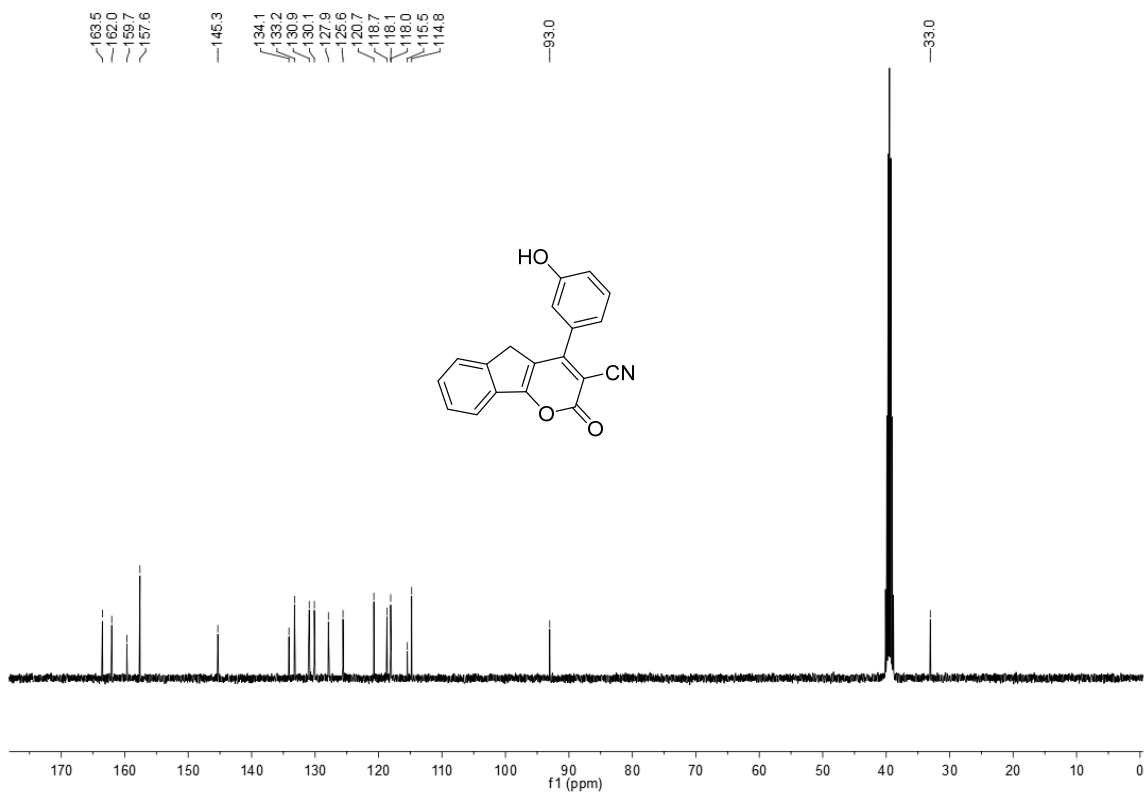

**<sup>13</sup>C NMR Spectrum of Compound 3j**

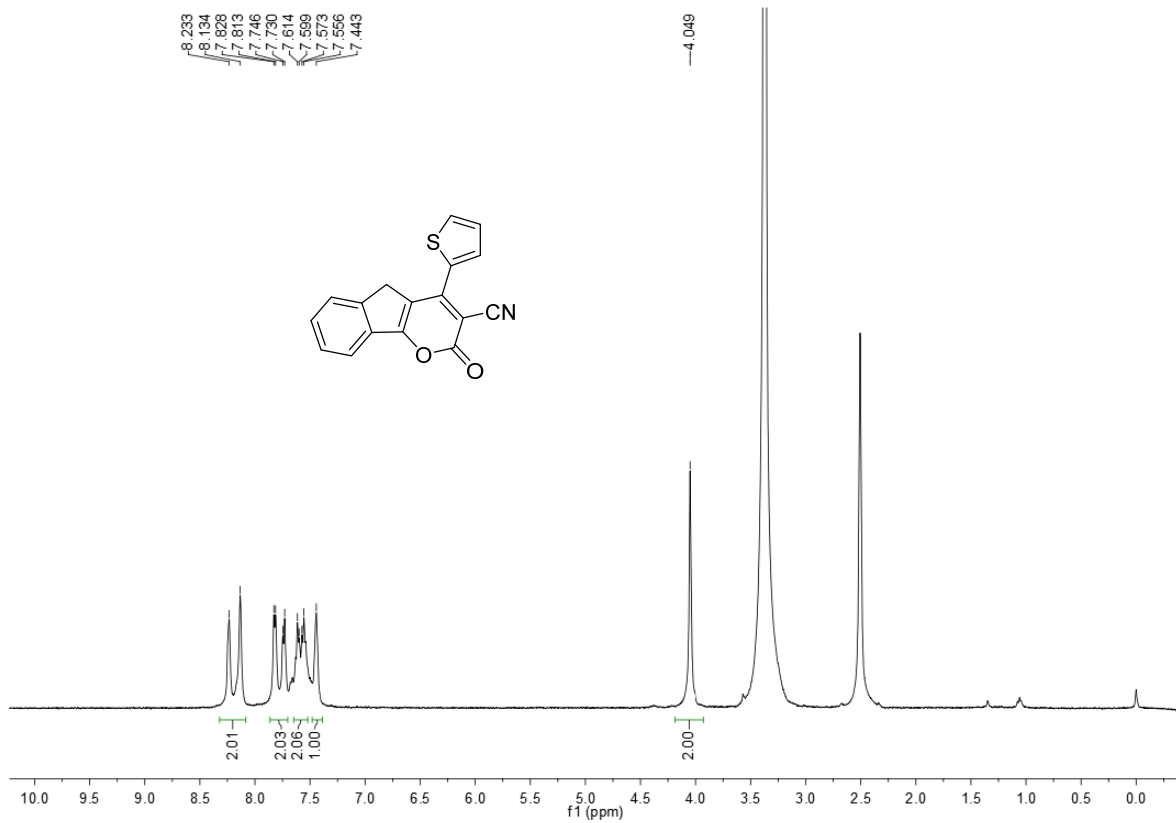

**<sup>1</sup>H NMR Spectrum of Compound 3k**

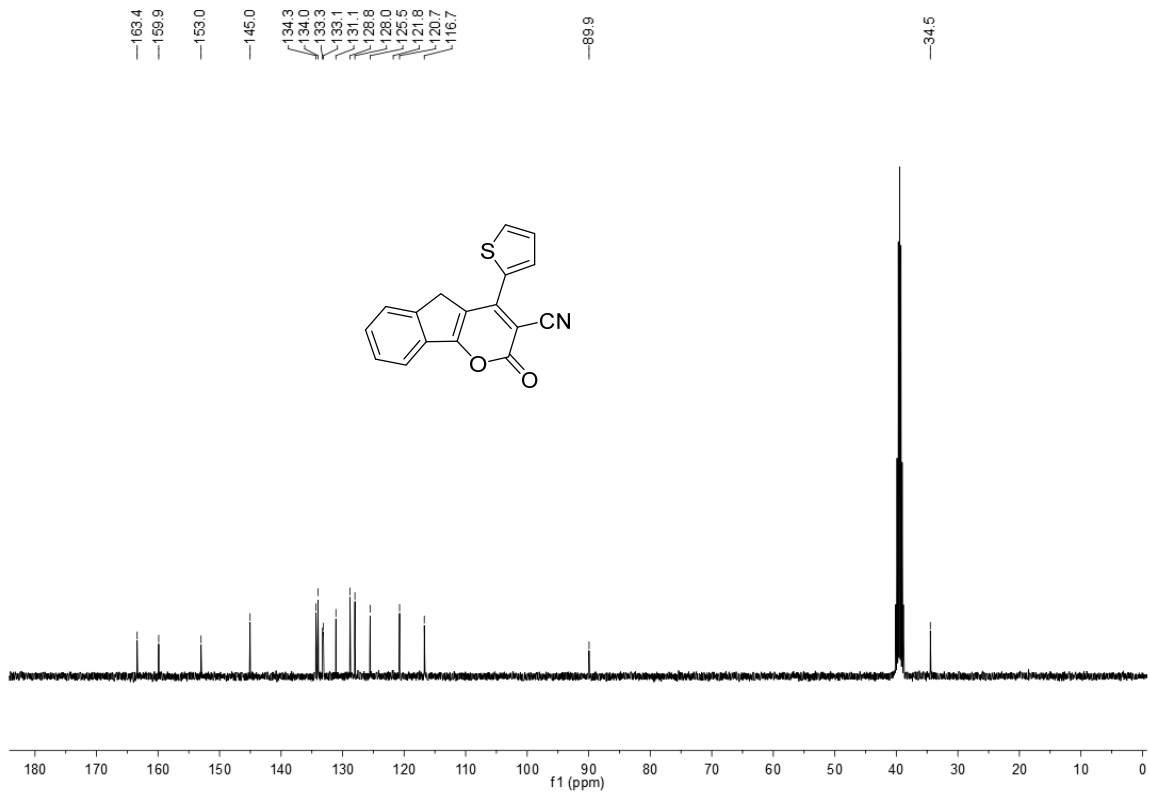

**<sup>13</sup>C NMR Spectrum of Compound 3k**

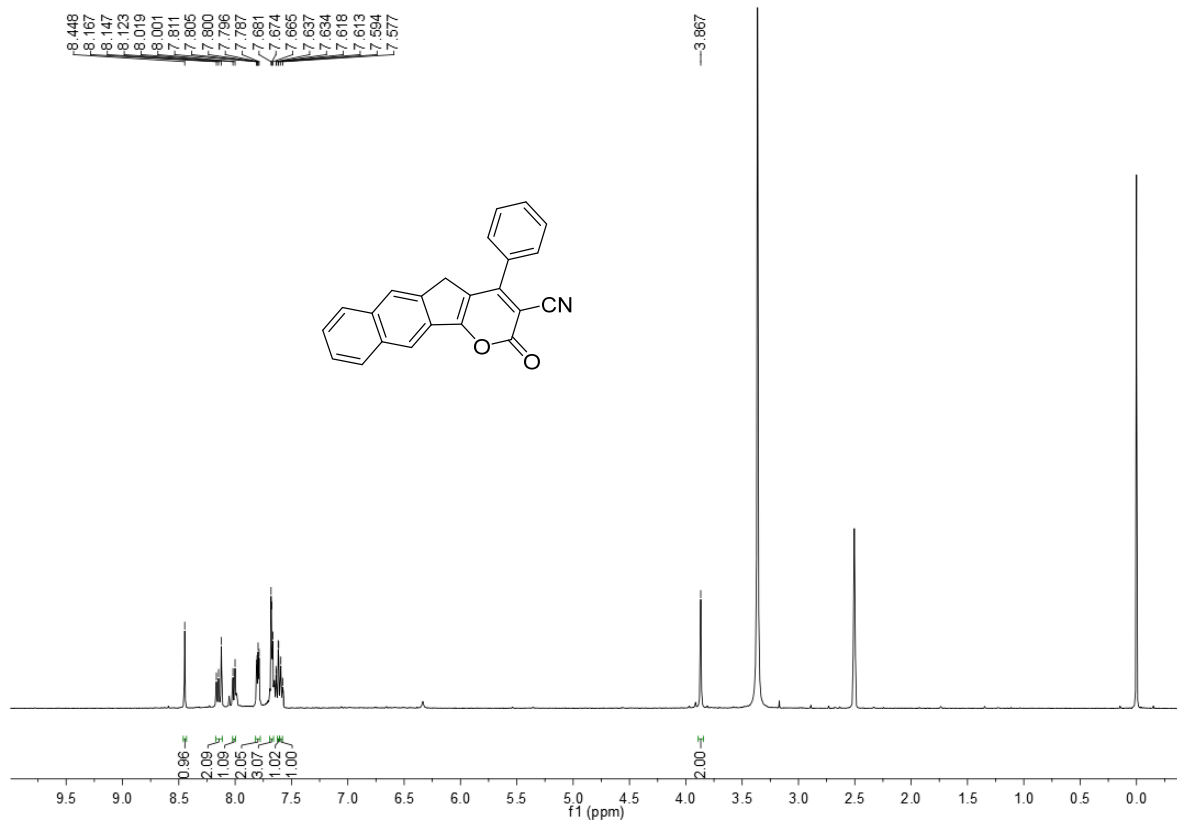

**<sup>1</sup>H NMR Spectrum of Compound 3l**

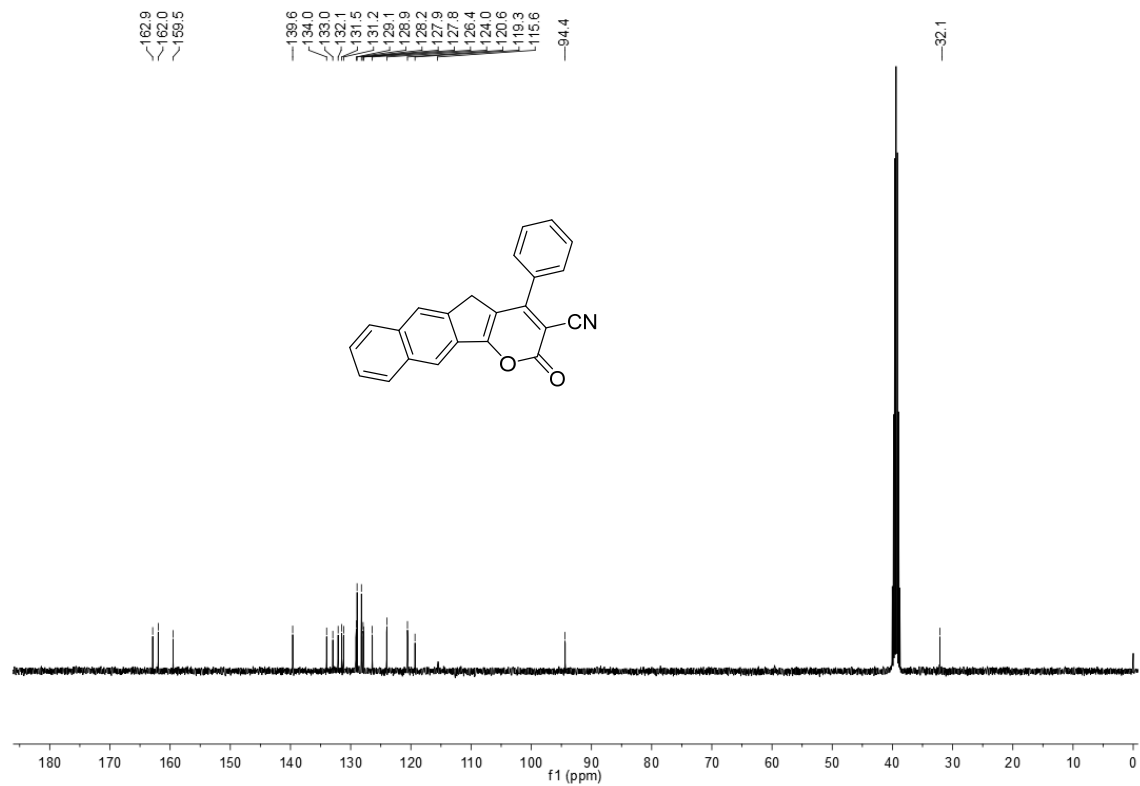

**<sup>13</sup>C NMR Spectrum of Compound 3l**

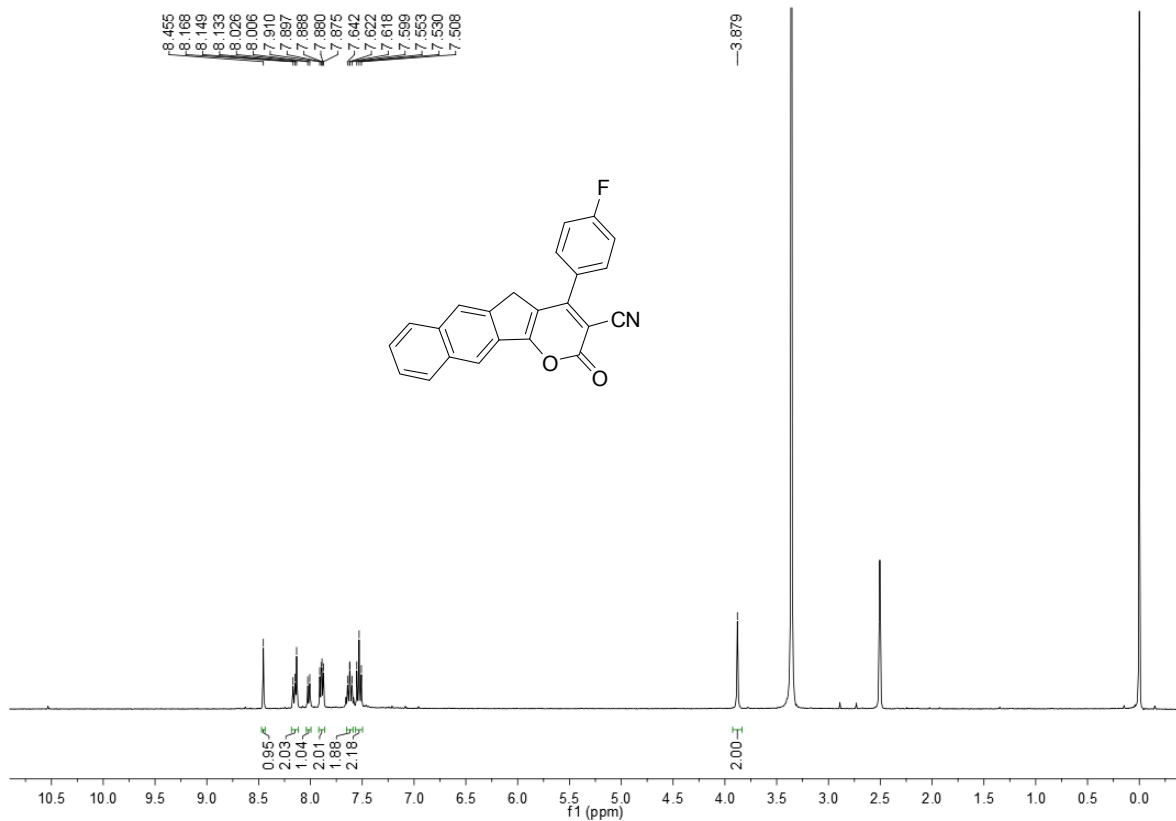

**<sup>1</sup>H NMR Spectrum of Compound 3m**

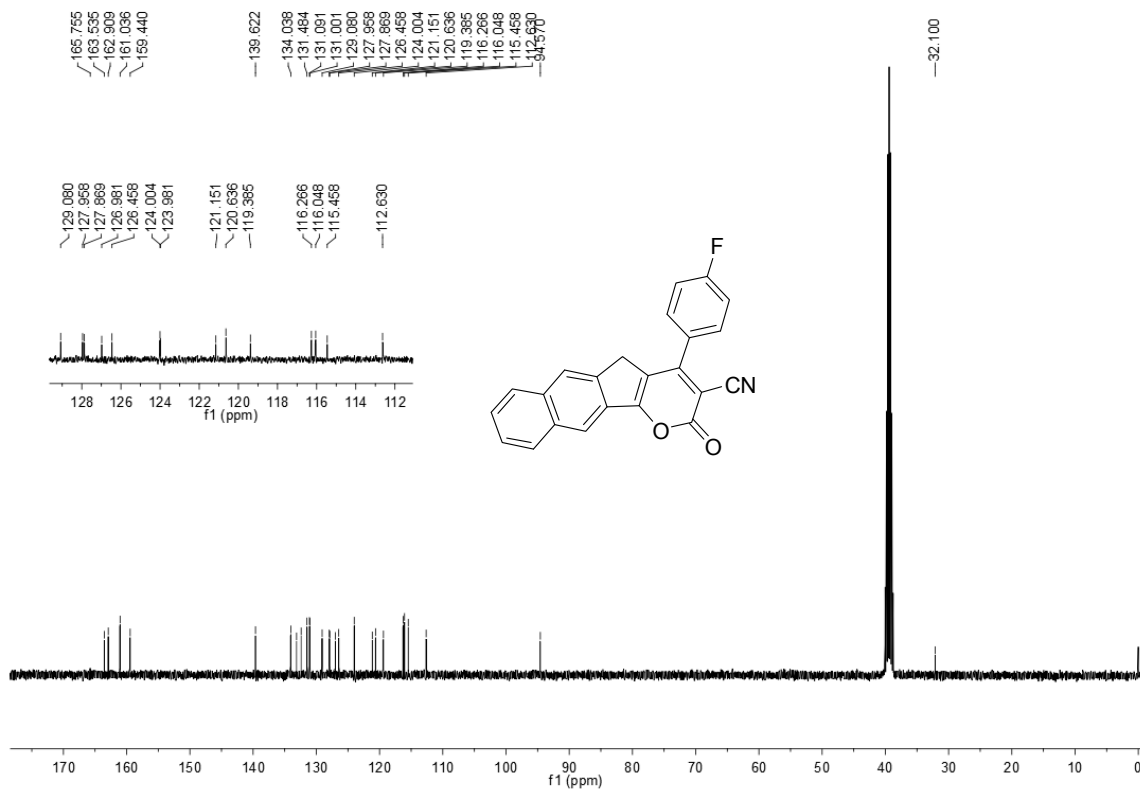

**<sup>13</sup>C NMR Spectrum of Compound 3m**

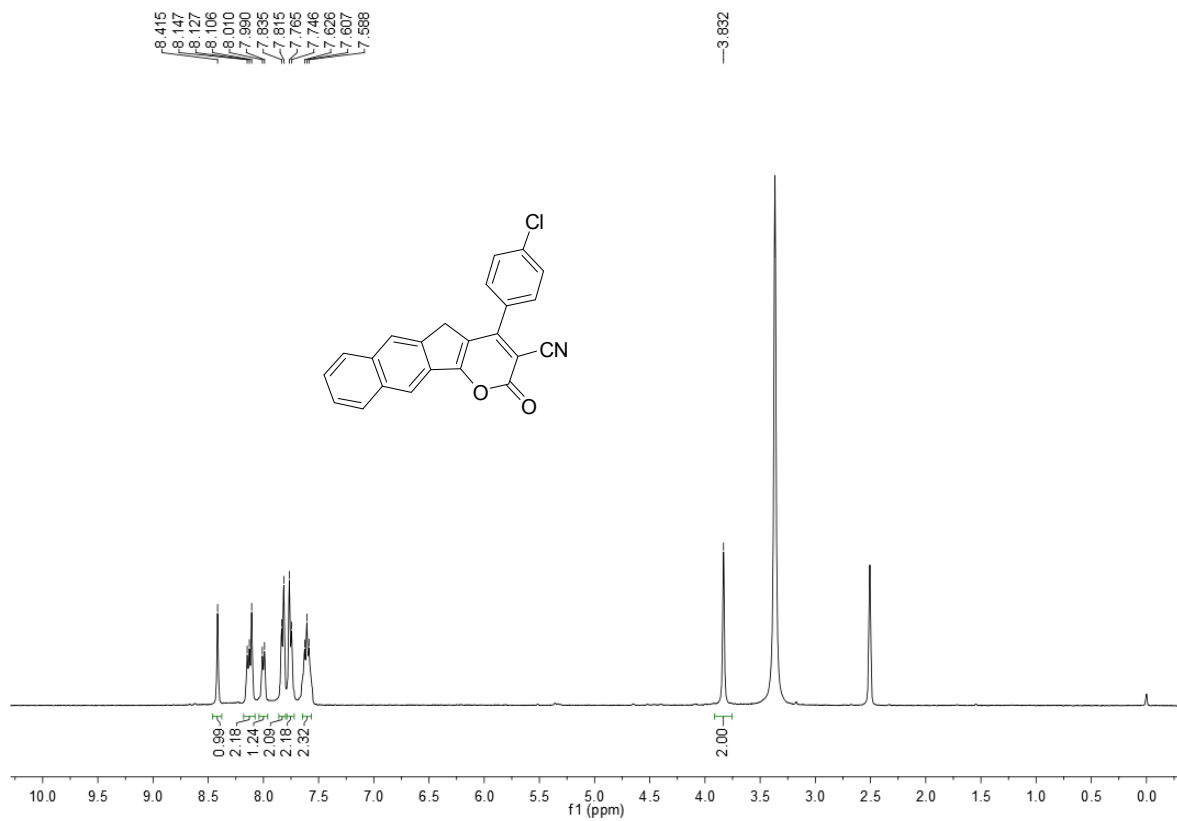

**<sup>1</sup>H NMR Spectrum of Compound 3n**

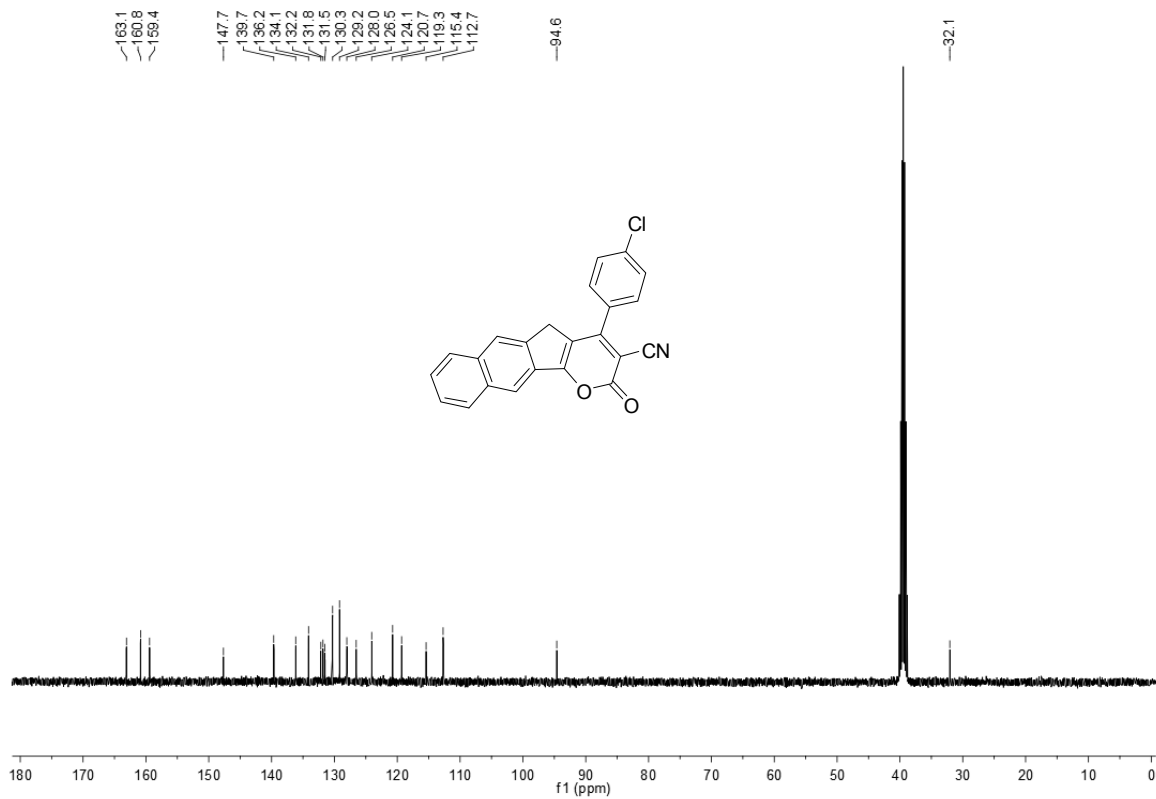

**<sup>13</sup>C NMR Spectrum of Compound 3n**



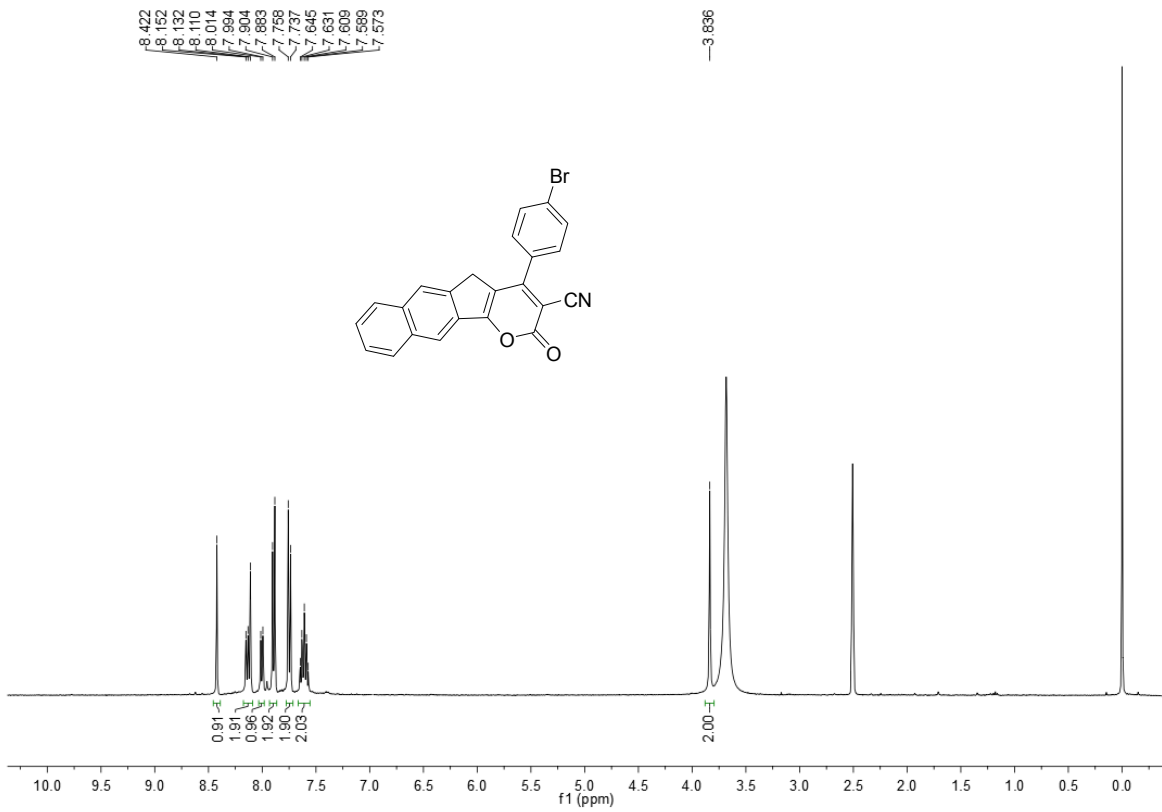

**<sup>1</sup>H NMR Spectrum of Compound 3o**

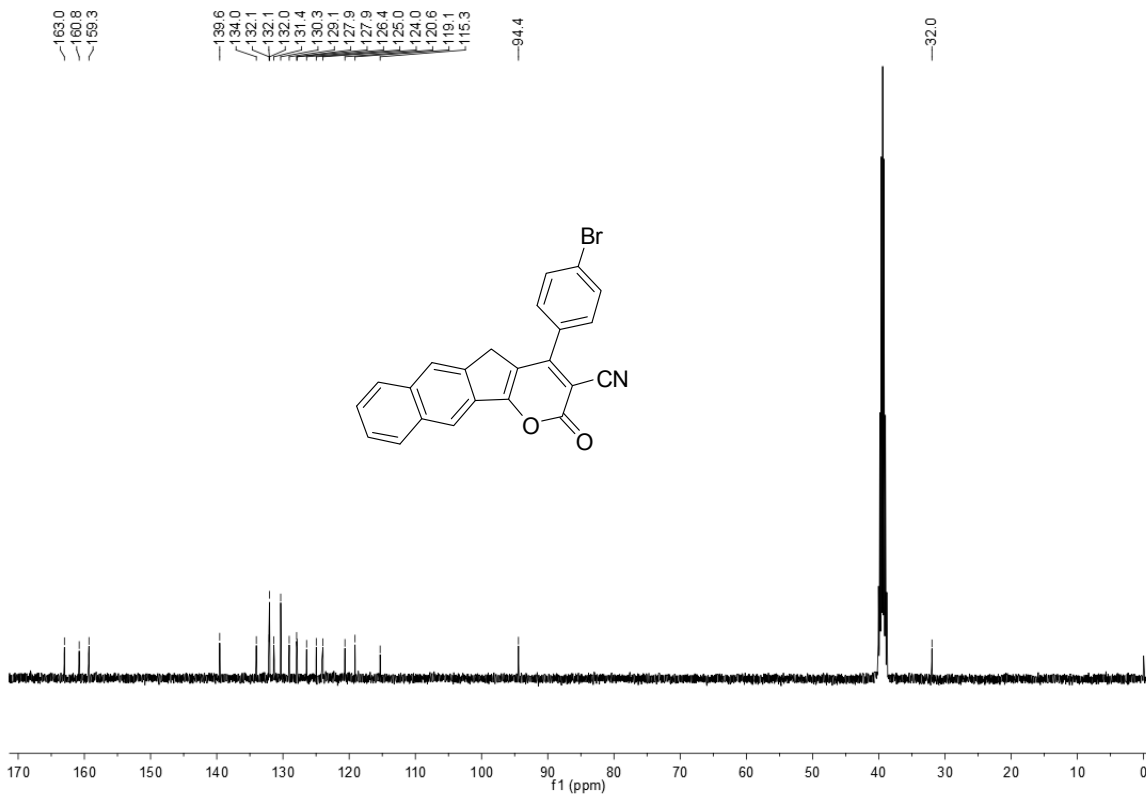

**<sup>13</sup>C NMR Spectrum of Compound 3o**

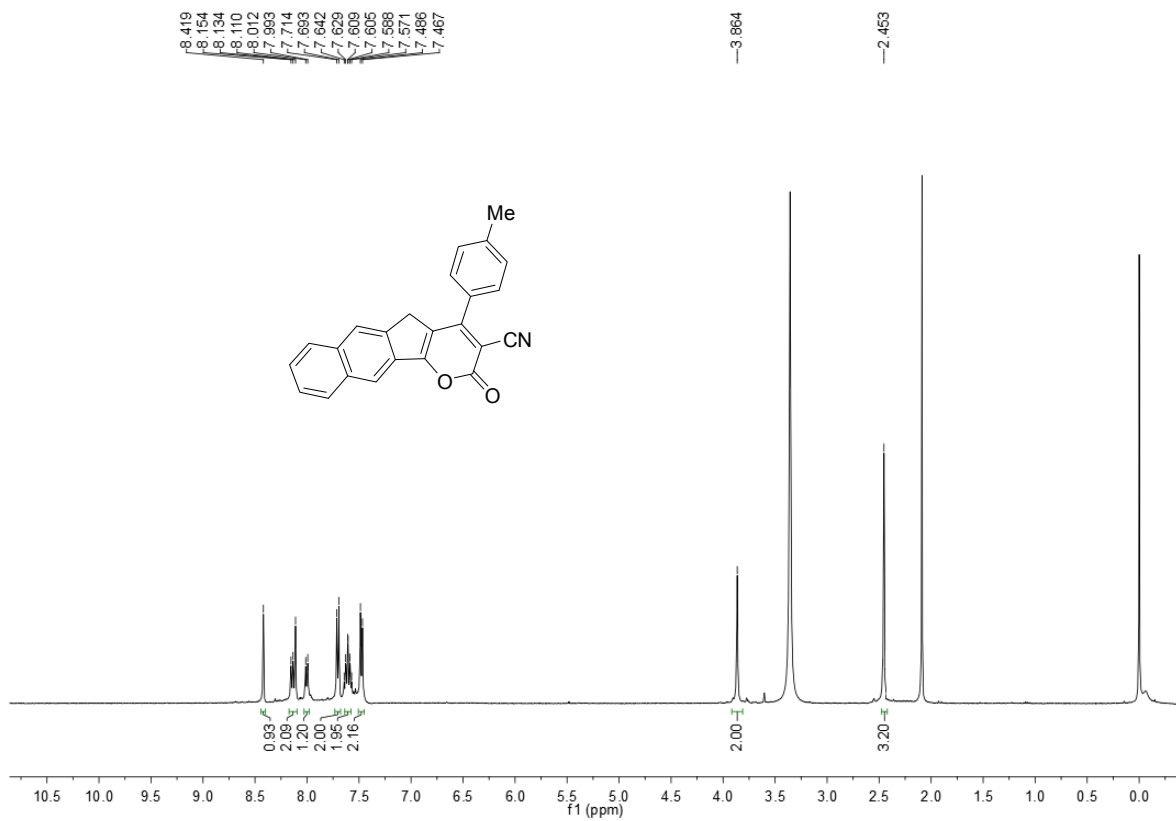

**<sup>1</sup>H NMR Spectrum of Compound 3p**

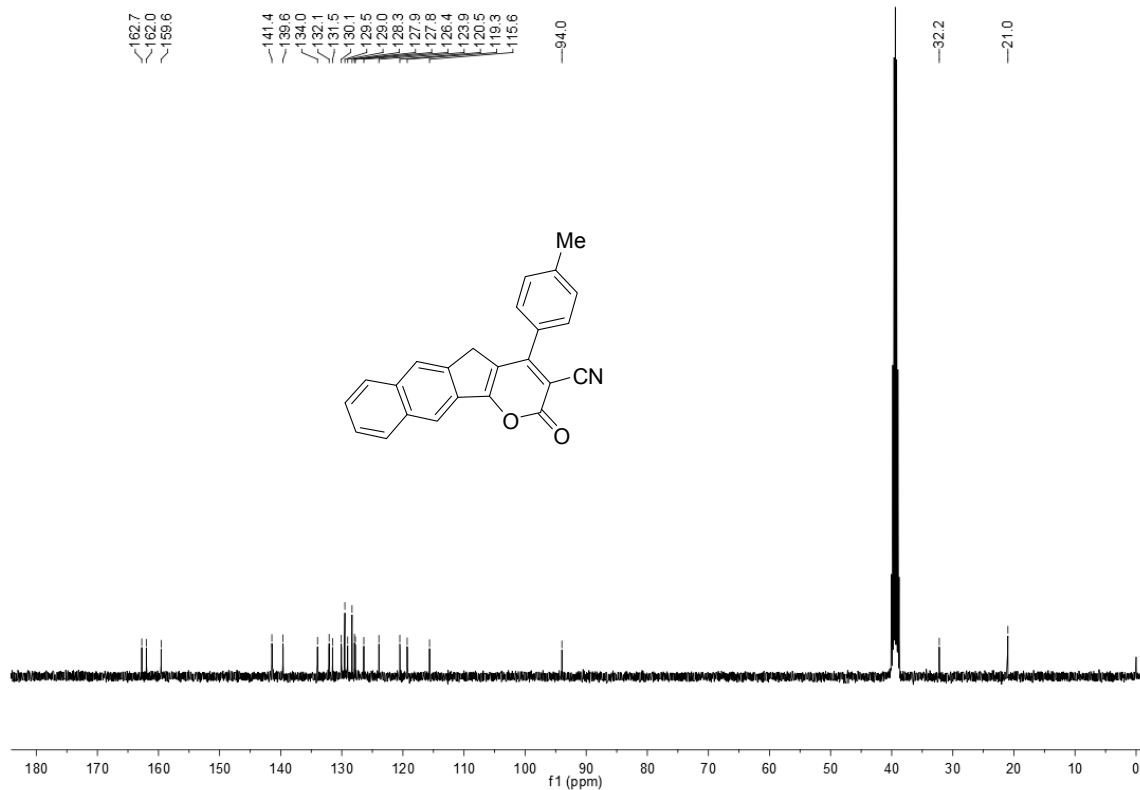

**<sup>13</sup>C NMR Spectrum of Compound 3p**

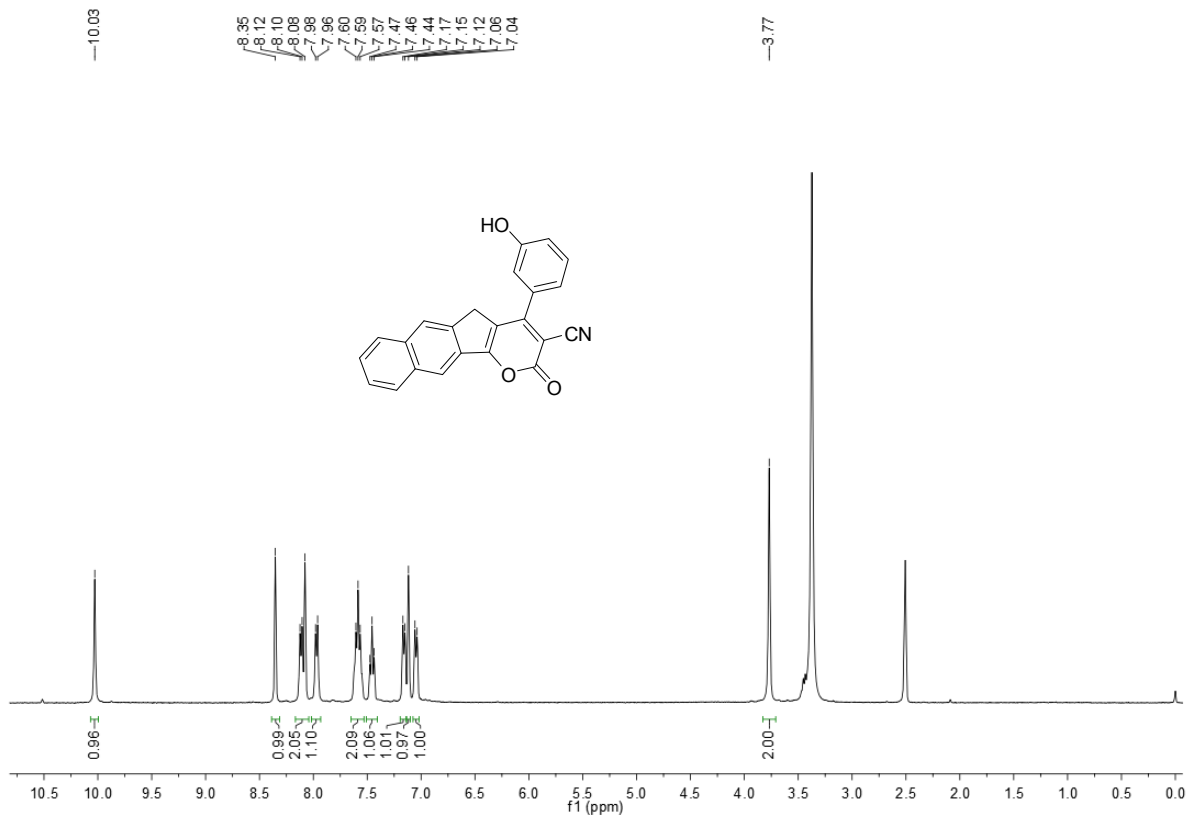

**<sup>1</sup>H NMR Spectrum of Compound 3q**

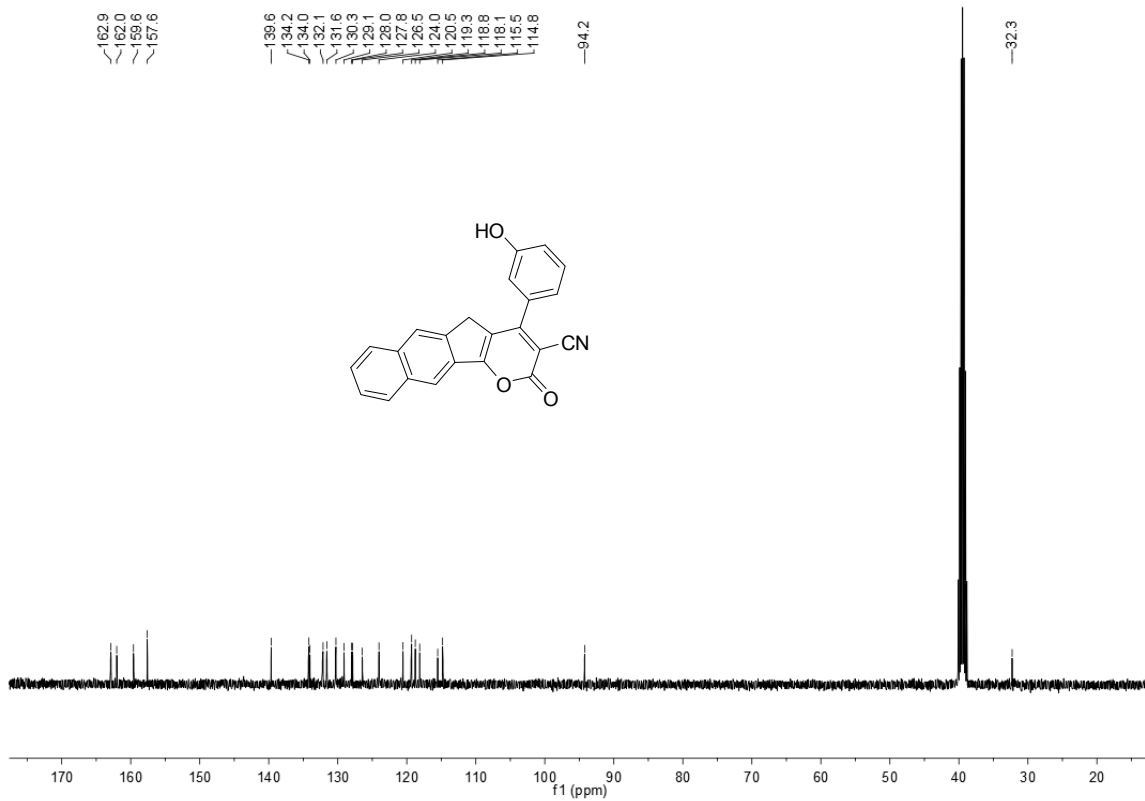

**<sup>13</sup>C NMR Spectrum of Compound 3q**

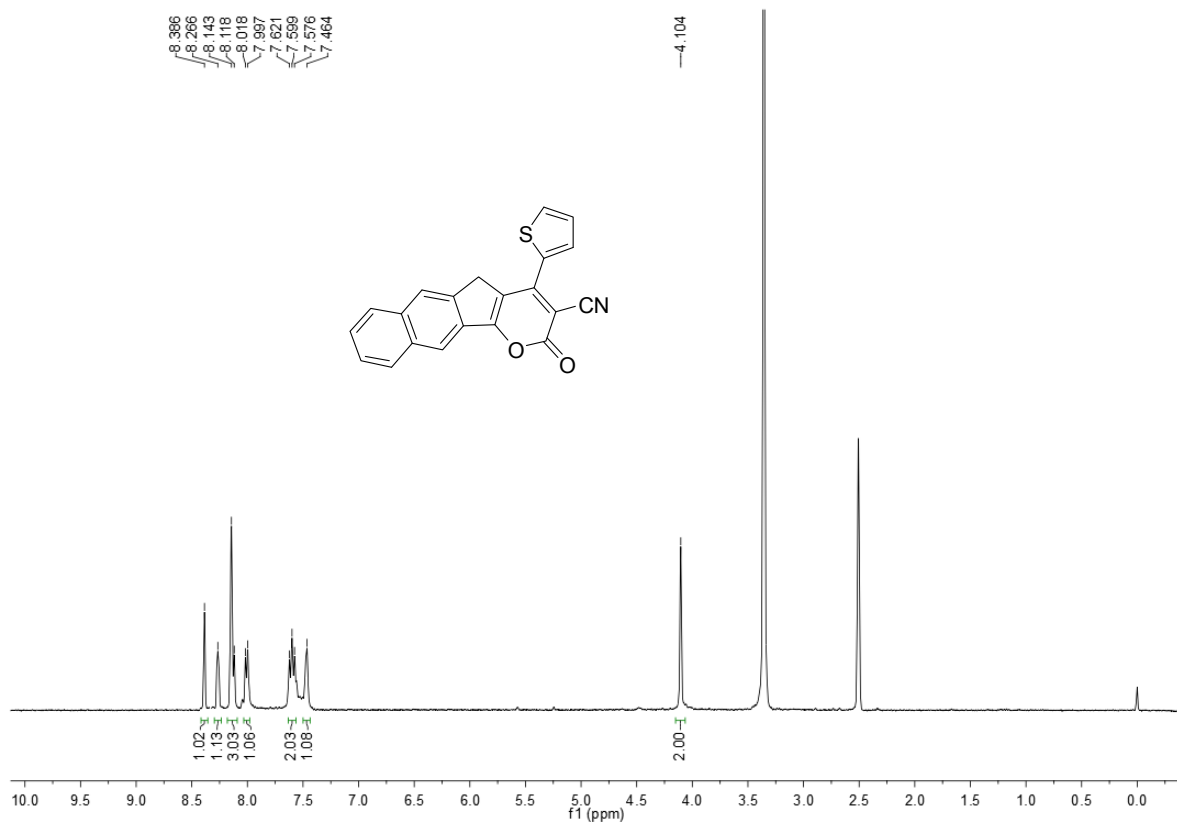

**<sup>1</sup>H NMR Spectrum of Compound 3r**

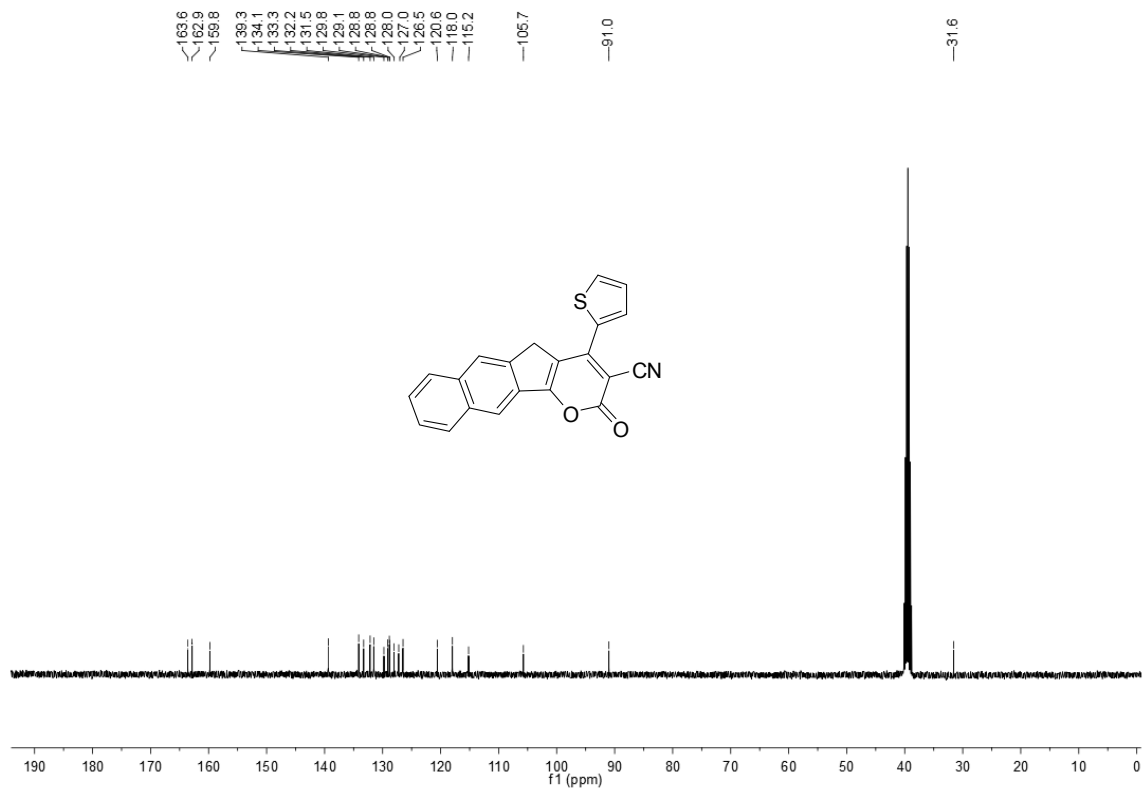

**<sup>13</sup>C NMR Spectrum of Compound 3r**

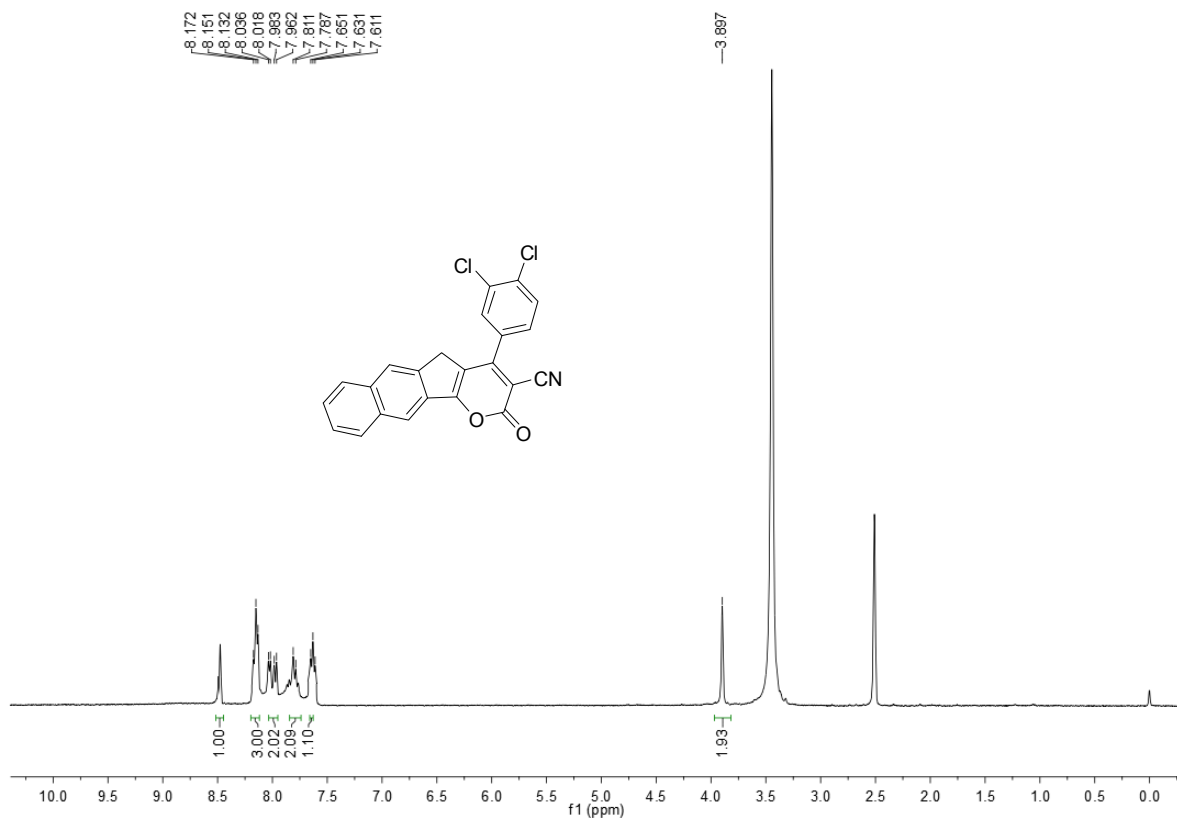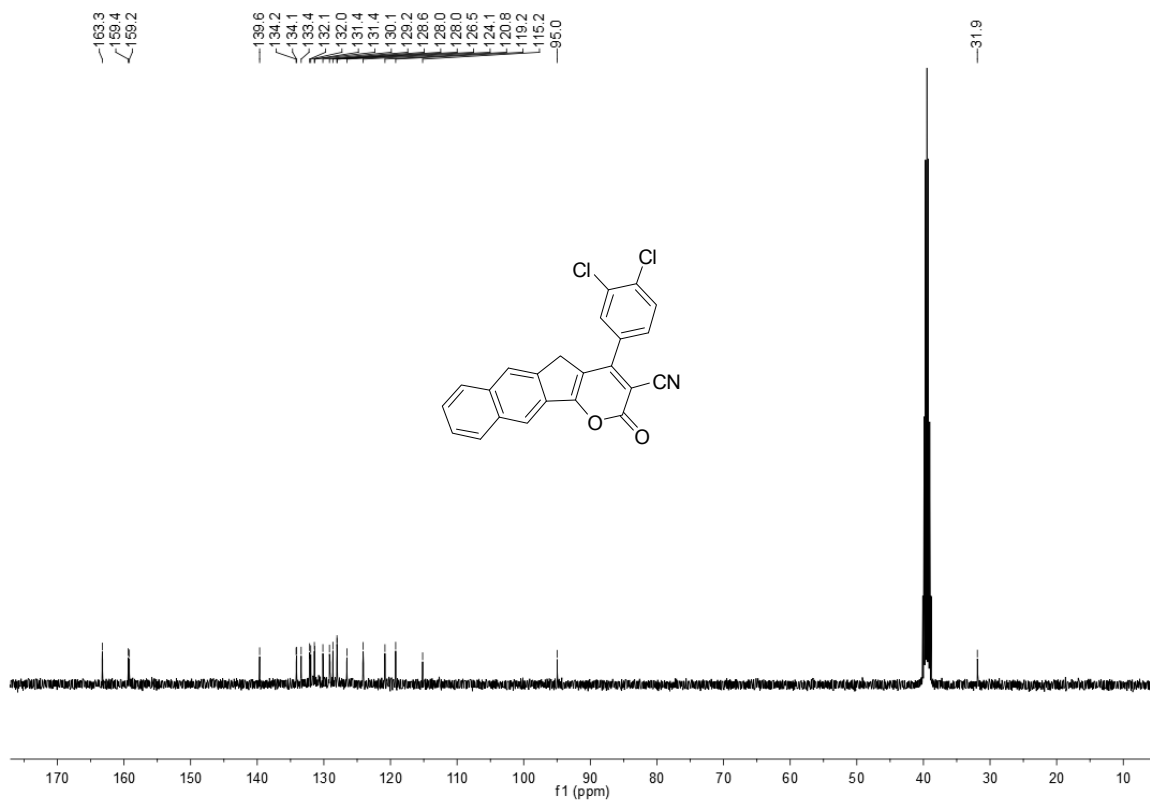

Supplement: c6ra16462e1.pdf [file c6ra16462e1.pdf]
